# Supplementary material for: Insights into protein synthesis dynamics of gilts from the same genetic background and age differing in protein deposition
Source: Sci Rep. 2026 May 15;16:22170. doi: 10.1038/s41598-026-52194-3 (PMC13369171; doi:10.1038/s41598-026-52194-3)
Supplement: Supplementary file 1 — Supplementary Material 1 [file 41598_2026_52194_MOESM1_ESM.xlsx]

## Sheet: Pos + Neg <0.05 adj P value
probeset_id	Locus	Gene_symbol	mrna_Symbol	logFC	AveExpr	t	P.Value	adj.P.Val	B	Rank	FC	Gene_func	mrna_RefSeq_name	mrna_RefSeq_func	total_probes	GO_biological_process	swissprot_name	13_MPN063.logExpression	18_MPN064.logExpression	20_MPN065.logExpression	3_MPN060.logExpression	6_MPN061.logExpression	7_MPN062.logExpression	1_MPN048.logExpression	10_MPN050.logExpression	17_MPN051.logExpression	19_MPN052.logExpression	22_MPN053.logExpression	5_MPN049.logExpression
15182655	---:---:-------	NA	NA	1.15019	3.01878	4.99102	0.000107871	0.0291441	1.43018	102	2.21943	NA	NA	NA	4	---	NA	1.78231	4.0911	2.13567	3.66829	4.13009	3.78897	2.37296	2.63654	3.16998	2.89395	2.97239	2.32896
15180815	---:---:-------	NA	NA	1.06152	3.90309	5.85784	1.81122e-05	0.0110919	3.06621	44	2.08714	NA	NA	NA	4	---	NA	4.11958	4.98148	2.93463	4.90073	4.55802	4.69028	3.71546	3.33663	3.3857	4.28682	4.09101	3.41643
15239349	chr15:-:55266184-55266286	NA	NA	1.04261	5.94665	4.98025	0.00011035	0.0291901	1.40857	103	2.05994	NA	NA	NA	2	---	NA	6.61793	6.53624	7.12514	6.50755	5.86815	5.74524	5.44306	5.11007	6.15456	6.15638	5.03313	5.5814
15239351	chr15:-:55388399-55388501	NA	NA	1.04261	5.94665	4.98025	0.00011035	0.0291901	1.40857	104	2.05994	NA	NA	NA	2	---	NA	6.61793	6.53624	7.12514	6.50755	5.86815	5.74524	5.44306	5.11007	6.15456	6.15638	5.03313	5.5814
15182981	---:---:-------	NA	NA	0.929925	3.36069	5.79344	2.06146e-05	0.011661	2.92189	49	1.90518	NA	NA	NA	4	---	NA	3.17803	4.42355	3.49058	3.5521	2.92382	4.04575	2.75556	2.66636	3.10677	2.35247	3.3908	2.66047
15204169	chr11:+:46768886-46768992	NA	NA	0.921065	6.95844	4.62115	0.000236829	0.0389354	0.700401	166	1.89351	NA	NA	NA	8	---	NA	7.63685	7.72809	7.53253	7.85052	7.19605	6.8619	6.71222	6.59559	7.19388	6.90364	6.58732	6.69811
15337403	chrX:-:72228804-72228910	NA	NA	0.911247	7.31686	6.59691	4.26715e-06	0.00494414	4.389	22	1.88067	NA	NA	NA	4	---	NA	7.39623	7.70931	8.00235	7.4004	7.6176	7.93767	6.70218	6.35314	7.20979	7.37691	7.10487	7.05759
15248760	chr17:-:34572384-34572454	NA	NA	0.905702	8.24999	7.44636	8.87633e-07	0.00239395	5.71384	10	1.87346	NA	NA	NA	19	---	NA	8.46891	8.31296	8.04231	8.4297	8.70149	8.55342	7.21358	7.48838	8.30168	7.64239	8.23799	8.74704
15238583	chr15:-:5604962-5605068	NA	NA	0.900591	8.25271	5.68634	2.5594e-05	0.0135638	2.75697	52	1.86683	NA	NA	NA	2	---	NA	8.79749	8.7094	8.89436	8.45726	8.61543	8.01177	7.67354	7.51398	8.40525	8.0481	7.89211	8.23012
15212439	chr12:-:33543160-33544892	NA	NA	0.858441	4.85118	5.8813	1.72808e-05	0.011075	3.09449	43	1.81308	NA	NA	NA	9	---	NA	4.77327	5.41072	5.26903	5.7467	5.16863	5.3855	4.47991	4.59772	4.77596	4.45437	5.71436	4.11304
15302305	chr6:-:26028851-26028957	NA	NA	0.857112	6.81737	4.7082	0.000196592	0.0380828	0.873278	139	1.81141	NA	NA	NA	9	---	NA	7.42188	7.4433	7.26907	7.51294	6.97206	6.75429	6.3189	6.39049	6.845	6.72348	6.51904	6.65639
15266944	chr2:-:127604869-127604939	NA	NA	0.854188	8.26462	7.18575	1.42207e-06	0.00279923	5.28985	14	1.80774	NA	NA	NA	22	---	NA	8.46933	8.34696	8.2699	8.43587	8.65764	8.58176	7.58372	7.28866	8.63247	7.71387	8.04842	8.46428
15311994	chr7:+:84242610-84242721	NA	NA	0.828309	5.51024	5.40791	4.52226e-05	0.0187153	2.19758	68	1.7756	NA	NA	NA	25	---	NA	5.59069	5.80797	5.87288	5.58389	5.79841	5.42137	4.92241	4.77935	5.812	4.954	4.70893	5.3141
15242033	chr15:-:131234485-131236305	OR6B2	LOC100521825	0.823322	3.1097	5.86566	1.78305e-05	0.0110919	3.06215	45	1.76948	olfactory receptor 6B2	XM_003133786	PREDICTED: Sus scrofa olfactory receptor 6B2 (LOC100521825), mRNA.	13	ENSSSCT00000022906 // GO:0007165 // signal transduction // inferred from electronic annotation /// ENSSSCT00000022906 // GO:0007186 // G-protein coupled receptor signaling pathway // inferred from electronic annotation /// ENSSSCT00000022906 // GO:0050911 // detection of chemical stimulus involved in sensory perception of smell // inferred from electronic annotation /// ENSSSCT00000022906 // GO:0…	ENSSSCT00000022906	3.46339	3.65593	2.96606	3.51143	2.64773	3.48912	2.41737	2.77452	3.56208	2.47223	2.78913	2.55334
15324767	chr9:+:1265472-1266413	OR10R2	LOC100522627	0.818686	6.08988	5.81401	1.97784e-05	0.011661	2.99938	46	1.7638	NA	XM_003129406	PREDICTED: Sus scrofa olfactory receptor 10R2-like (LOC100522627), mRNA.	11	ENSSSCT00000015945 // GO:0007165 // signal transduction // inferred from electronic annotation /// ENSSSCT00000015945 // GO:0007186 // G-protein coupled receptor signaling pathway // inferred from electronic annotation /// ENSSSCT00000015945 // GO:0050911 // detection of chemical stimulus involved in sensory perception of smell // inferred from electronic annotation	ENSSSCT00000015945	6.49246	6.88221	6.74367	6.44163	6.40253	6.60696	5.82844	6.03364	6.2298	6.17532	5.87515	5.66034
15180835	---:---:-------	NA	NA	0.817108	2.51839	4.88907	0.000133806	0.0315338	1.23172	116	1.76187	NA	NA	NA	4	---	NA	2.50177	2.81341	3.17246	2.78053	2.73345	2.4111	2.0065	2.72532	2.1107	2.32008	2.31641	1.73831
15180611	---:---:-------	NA	NA	0.816582	3.44125	5.39774	4.61805e-05	0.0187153	2.20844	67	1.76123	NA	NA	NA	4	---	NA	3.74368	3.54271	2.51424	4.10766	3.4649	3.65773	2.66385	2.55803	3.33409	2.95627	3.28882	3.38224
15291155	chr5:-:2863318-2863467	NA	LOC102166814	0.80615	7.4751	5.22937	6.54648e-05	0.022122	1.8897	80	1.74854	NA	XR_303340	PREDICTED: Sus scrofa uncharacterized LOC102166814 (LOC102166814), ncRNA.	14	---	NA	7.82876	7.6284	7.49555	7.62097	8.1622	7.63407	7.07354	6.65589	7.74867	7.00445	7.09482	7.81315
15312076	chr7:+:84625248-84625359	NA	NA	0.788125	5.39206	4.34145	0.000432557	0.0483824	0.146028	246	1.72683	NA	NA	NA	25	---	NA	5.39194	5.66538	5.65628	5.44101	5.66899	5.19398	4.82211	4.60086	5.87001	4.6565	4.65826	5.2118
15250412	chr18:+:7725584-7725690	NA	NA	0.78372	2.56594	5.22091	6.66276e-05	0.022122	1.86845	83	1.72156	NA	NA	NA	8	---	NA	3.05774	3.16118	2.36892	2.66712	3.82445	3.12282	2.29016	2.15523	2.30523	3.26605	2.25827	2.30101
15182353	---:---:-------	NA	NA	0.756302	6.6623	7.06148	1.78618e-06	0.00308605	5.08872	16	1.68915	NA	NA	NA	4	---	NA	6.74385	6.86781	6.90659	6.20157	6.89782	6.71827	6.47751	5.74648	5.95746	7.44907	6.11214	6.0405
15260141	chr2:+:136964726-136965667	OR5D13	LOC100519081	0.734587	4.22925	6.3726	6.56621e-06	0.00583715	3.99002	30	1.66392	olfactory receptor 5D13-like	XM_003124111	PREDICTED: Sus scrofa olfactory receptor 5D13-like (LOC100519081), mRNA.	12	ENSSSCT00000015803 // GO:0007165 // signal transduction // inferred from electronic annotation /// ENSSSCT00000015803 // GO:0007186 // G-protein coupled receptor signaling pathway // inferred from electronic annotation /// ENSSSCT00000015803 // GO:0050911 // detection of chemical stimulus involved in sensory perception of smell // inferred from electronic annotation /// ENSSSCT00000015803 // GO:0…	ENSSSCT00000015803	4.07998	4.60214	4.72227	4.45994	4.68115	4.49	3.82357	4.26127	4.19599	4.31583	4.04627	3.61523
15180067	---:---:-------	NA	NA	0.715177	3.05477	6.2876	7.74499e-06	0.00621724	3.69873	35	1.64168	NA	NA	NA	4	---	NA	4.38227	3.56523	3.47059	2.32015	2.86879	3.78254	2.84653	2.77502	3.94409	2.33212	3.0676	2.70873
15337401	chrX:-:70859888-70860160	NA	NA	0.713665	3.53244	4.33233	0.000441176	0.0484992	0.123557	250	1.63996	NA	NA	NA	9	ENSSSCT00000013638 // GO:0006508 // proteolysis // inferred from electronic annotation	ENSSSCT00000013638	3.9008	3.55555	4.10252	3.95407	4.10082	3.49296	3.09393	3.16639	3.0169	3.56764	3.64657	3.32265
15214377	chr12:-:56174900-56174970	NA	NA	0.708365	10.1765	8.70009	1.04135e-07	0.000895821	7.51341	2	1.63395	NA	NA	NA	18	---	NA	10.3263	10.2262	10.2937	10.2245	10.3908	10.3791	9.59967	9.43768	10.2772	9.60189	10.0888	10.5186
15261937	chr2:-:11524072-11524971	OR4L1	LOC100153467	0.688226	3.13057	4.61847	0.000238194	0.0389354	0.700398	167	1.6113	NA	XM_001929460	PREDICTED: Sus scrofa olfactory receptor 4L1-like (LOC100153467), mRNA.	10	XM_001929460 // GO:0007165 // signal transduction // inferred from electronic annotation /// XM_001929460 // GO:0007186 // G-protein coupled receptor signaling pathway // --- /// XM_001929460 // GO:0007186 // G-protein coupled receptor signaling pathway // inferred from electronic annotation /// XM_001929460 // GO:0007608 // sensory perception of smell // inferred from electronic annotation /// X…	ENSSSCT00000002446 ENSSSCT00000014405	3.21185	3.15135	3.90093	2.33752	3.93115	3.42957	2.59611	3.49423	2.95877	2.68458	3.1888	2.74764
15307072	chr6:-:119374690-119374794	NA	NA	0.685777	10.3882	4.64854	0.000223337	0.0389354	0.757622	155	1.60857	NA	NA	NA	25	---	NA	10.5221	10.2911	10.106	10.7504	10.6765	10.6437	9.75946	9.60878	10.4842	9.90056	10.2761	10.7194
15255309	chr2:+:37502386-37502636	RPS15A	LOC100522598	0.679251	8.62765	4.74804	0.000180571	0.037167	0.95224	131	1.60131	NA	XR_130388	PREDICTED: Sus scrofa 40S ribosomal protein S15a pseudogene (LOC100522598), misc_RNA.	10	---	NA	9.13699	9.21203	9.25339	8.85077	8.86268	8.8948	8.40388	8.15246	8.81501	8.65823	8.69602	8.37442
15327591	chr9:+:94207224-94207812	NA	NA	0.677978	5.53161	6.93483	2.25822e-06	0.00327537	4.87324	18	1.5999	NA	NA	NA	13	ENSSSCT00000016783 // GO:0006412 // translation // inferred from electronic annotation /// ENSSSCT00000016783 // GO:0006412 // translation // ---	ENSSSCT00000016783	5.97307	5.76465	5.99358	5.25589	5.74354	5.88157	5.07099	5.24254	5.65341	5.49696	5.61012	4.99271
15336107	chrX:-:24071806-24071894	NA	NA	0.663461	4.28674	6.72506	3.34608e-06	0.00461056	4.61687	20	1.58388	NA	NA	NA	25	---	NA	4.66734	4.9244	4.73789	4.54268	4.65676	4.58371	3.97135	4.14866	4.50368	4.16959	4.29708	3.9448
15326899	chr9:+:63198332-63198437	NA	NA	0.658539	4.30914	4.43902	0.00035035	0.0449068	0.341971	215	1.57848	NA	NA	NA	9	---	NA	4.27453	4.54398	4.48704	4.654	4.40016	4.65021	3.73629	3.67714	3.86864	5.01605	3.84046	4.0751
15210920	chr12:-:12437386-12437454	NA	NA	0.656457	10.8358	7.33784	1.07891e-06	0.00247771	5.55772	12	1.57621	NA	NA	NA	20	---	NA	11.1976	11.1505	10.9858	11.033	11.1951	11.2435	10.3661	10.4887	11.2616	10.6872	10.5712	11.0732
15330786	chr9:-:49387551-49388543	OR10S1	LOC100512247	0.651595	3.95632	5.15958	7.57249e-05	0.0237139	1.75233	88	1.5709	olfactory receptor 10S1	XM_003129978	PREDICTED: Sus scrofa olfactory receptor 10S1 (LOC100512247), mRNA.	14	XM_003129978 // GO:0007165 // signal transduction // inferred from electronic annotation /// XM_003129978 // GO:0007186 // G-protein coupled receptor signaling pathway // --- /// XM_003129978 // GO:0007186 // G-protein coupled receptor signaling pathway // inferred from electronic annotation /// XM_003129978 // GO:0007608 // sensory perception of smell // --- /// XM_003129978 // GO:0007608 // sen…	ENSSSCT00000016525	3.69643	4.10995	4.28578	4.25404	4.05996	4.35539	3.36081	3.68038	3.61338	3.61396	4.66685	3.16323
15307074	chr6:-:119375228-119375307	NA	NA	0.649783	6.98965	8.40767	1.68605e-07	0.000895821	7.15196	3	1.56893	NA	NA	NA	19	---	NA	7.10159	7.05331	6.93712	7.19174	7.12103	7.21876	6.41314	6.50363	6.97995	6.8092	6.57279	7.23423
15234692	chr14:-:137543683-137543820	FGFR2IIIC	NA	0.626502	3.40614	5.02448	0.000100531	0.0279621	1.48779	99	1.54382	FGF receptor 2IIIc	NA	NA	14	AJ439896 // GO:0000122 // negative regulation of transcription from RNA polymerase II promoter // inferred from sequence or structural similarity /// AJ439896 // GO:0001525 // angiogenesis // inferred from sequence or structural similarity /// AJ439896 // GO:0001657 // ureteric bud development // inferred from sequence or structural similarity /// AJ439896 // GO:0001701 // in utero embryonic deve…	NA	3.99064	3.95324	3.13685	3.77619	3.35413	3.84638	3.17307	2.92629	3.41663	2.92892	3.99908	3.25928
15330068	chr9:-:32995753-33009058	MMP27	MMP27	0.625528	3.90876	6.4257	5.92573e-06	0.00583219	4.04469	27	1.54278	matrix metallopeptidase 27	XM_013979325	PREDICTED: Sus scrofa matrix metallopeptidase 27 (MMP27), transcript variant X1, mRNA.	25	ENSSSCT00000016346 // GO:0006508 // proteolysis // inferred from electronic annotation /// ENSSSCT00000022911 // GO:0006508 // proteolysis // inferred from electronic annotation	ENSSSCT00000016346 ENSSSCT00000022911	4.191	4.12552	4.44709	3.54223	3.95585	3.59556	3.37869	4.07783	3.70719	3.70986	3.85507	3.3419
15207682	chr12:+:20259192-20259269	NA	NA	0.597254	10.8444	4.45686	0.000337136	0.0446505	0.378046	204	1.51283	NA	NA	NA	2	---	NA	11.5015	11.4521	11.3546	10.8679	11.4327	10.9967	10.6003	10.7684	11.0681	11.38	10.4407	10.7464
15211805	chr12:-:20429361-20429438	NA	NA	0.597254	10.8444	4.45686	0.000337136	0.0446505	0.378046	205	1.51283	NA	NA	NA	2	---	NA	11.5015	11.4521	11.3546	10.8679	11.4327	10.9967	10.6003	10.7684	11.0681	11.38	10.4407	10.7464
15349683	g335308456:+:1-2194	CHN1	LOC100627143	0.59591	5.41977	4.42839	0.000358478	0.0455341	0.316691	217	1.51143	NA	XM_013991596	PREDICTED: Sus scrofa N-chimaerin (LOC100627143), mRNA.	25	---	NA	6.28502	5.32057	5.89228	5.82889	5.56861	5.77734	5.38311	4.98149	5.3301	5.37149	5.46545	5.29946
15327765	chr9:+:103799464-103799570	NA	NA	0.585225	4.43398	6.3835	6.42909e-06	0.00583715	3.98415	31	1.50027	NA	NA	NA	11	---	NA	4.6606	4.51818	4.84483	4.66028	4.71908	4.6313	4.09594	4.16497	4.38719	4.64574	4.09252	3.85256
15217623	chr13:+:94184607-94184737	NA	NA	0.579824	11.4336	4.8224	0.000154138	0.0339819	1.09914	125	1.49467	NA	NA	NA	17	---	NA	11.5022	11.2728	11.0933	11.9531	11.5839	11.595	10.8303	10.7436	11.6254	10.7411	11.3614	11.7698
15209227	chr12:+:45670075-45670182	NA	NA	0.573868	3.32639	5.20382	6.90442e-05	0.0226514	1.82043	84	1.48851	NA	NA	NA	9	---	NA	3.6009	4.39477	3.25948	3.47649	3.44522	4.37255	3.512	2.34906	3.46197	3.46493	3.08344	2.99824
15191141	chr1:+:285135541-285153301	NCS1	NCS1	0.568748	5.80792	8.07243	2.96846e-07	0.00102256	6.61334	8	1.48324	NA	XM_003122241	PREDICTED: Sus scrofa neuronal calcium sensor 1 (NCS1), mRNA.	11	---	NA	5.87503	5.98424	5.9917	5.54932	6.30827	5.99722	6.37883	5.39167	5.52744	5.76	5.78005	5.37605
15316308	chr7:-:48979635-48979741	NA	NA	0.565229	3.01665	5.02008	0.000101466	0.0279621	1.48765	100	1.47962	NA	NA	NA	8	---	NA	3.50201	2.69107	3.18786	3.25302	3.47442	3.27686	2.51925	3.04127	2.93619	2.99598	2.8804	2.87224
15271380	chr3:+:76055658-76055983	NA	NA	0.55598	6.91688	8.55885	1.31252e-07	0.000895821	7.13617	4	1.47017	NA	NA	NA	16	---	NA	6.5931	6.66067	7.1695	6.99572	7.05585	6.91199	6.43721	6.15093	6.8597	6.00378	6.97634	7.07214
15294332	chr5:-:66203055-66269619	CPNE8	CPNE8	0.546698	4.7474	4.45215	0.00034057	0.0446505	0.365409	209	1.46074	copine VIII	XM_003126603	PREDICTED: Sus scrofa copine VIII (CPNE8), transcript variant X2, mRNA.	25	---	ENSSSCT00000000842 ENSSSCT00000027279	5.17528	5.76816	4.79308	4.59406	5.06167	4.65319	4.34587	4.36058	4.54438	4.83872	4.64856	4.37913
15181819	---:---:-------	NA	NA	0.546658	7.73112	5.36818	4.90859e-05	0.0193244	2.1595	70	1.4607	NA	NA	NA	4	---	NA	8.09296	8.06266	8.31161	7.6119	8.23219	8.08937	7.77154	7.51881	7.68782	7.85466	7.71778	7.59352
15223034	chr14:+:2118859-2118965	NA	NA	0.542808	3.56286	6.09965	1.1196e-05	0.00771351	3.47346	39	1.45681	NA	NA	NA	25	---	NA	3.83132	4.05492	3.26242	3.81106	3.74932	3.90941	3.17648	3.3047	3.64243	3.19137	3.6395	3.66764
15229308	chr14:-:2395971-2396077	NA	NA	0.542808	3.56286	6.09965	1.1196e-05	0.00771351	3.47346	40	1.45681	NA	NA	NA	25	---	NA	3.83132	4.05492	3.26242	3.81106	3.74932	3.90941	3.17648	3.3047	3.64243	3.19137	3.6395	3.66764
15282771	chr4:-:9952425-9954457	GSDMC	GSDMC	0.531515	7.51269	4.77552	0.000170301	0.0366652	1.00806	128	1.44545	gasdermin C	XM_001925332	PREDICTED: Sus scrofa gasdermin C (GSDMC), transcript variant X3, mRNA.	9	---	NA	7.62034	7.95805	8.05002	7.04951	7.9612	7.92531	7.48901	7.18699	7.50009	7.61083	7.48345	7.43115
15274859	chr3:-:36522142-36522225	NA	NA	0.531037	10.7691	6.27768	7.8962e-06	0.00621724	3.82717	33	1.44497	NA	NA	NA	25	---	NA	10.9818	10.7522	10.9129	11.0147	11.0083	10.9572	10.4181	10.3159	10.5338	10.6132	10.8343	10.8527
15274879	chr3:-:36637874-36637957	NA	NA	0.531037	10.7691	6.27768	7.8962e-06	0.00621724	3.82717	34	1.44497	NA	NA	NA	25	---	NA	10.9818	10.7522	10.9129	11.0147	11.0083	10.9572	10.4181	10.3159	10.5338	10.6132	10.8343	10.8527
15333943	chrX:+:46750899-46751005	NA	NA	0.525202	4.55893	5.32511	5.36609e-05	0.0202478	2.06519	73	1.43913	NA	NA	NA	10	---	NA	4.73695	4.59553	4.70614	4.68121	4.57337	4.97188	4.37487	4.13864	4.56962	3.87179	4.72857	3.90698
15320912	chr8:+:61057752-61215246	ART3	ART3	0.523189	9.87708	4.37771	0.000399941	0.047587	0.223257	228	1.43713	ADP-ribosyltransferase 3	NM_001244205	Sus scrofa ADP-ribosyltransferase 3 (ART3), mRNA.	25	NM_001244205 // GO:0006471 // protein ADP-ribosylation // inferred from electronic annotation /// ENSSSCT00000009831 // GO:0006471 // protein ADP-ribosylation // inferred from electronic annotation /// ENSSSCT00000033261 // GO:0006471 // protein ADP-ribosylation // inferred from electronic annotation /// ENSSSCT00000035052 // GO:0006471 // protein ADP-ribosylation // inferred from electronic anno…	ENSSSCT00000009831 ENSSSCT00000033261 ENSSSCT00000035052	9.92138	9.67994	9.84912	9.94185	9.83992	9.70162	9.20483	10.7459	9.35648	9.39067	10.2682	9.25123
15341871	g335282159:+:1-1371	NA	NA	0.517112	4.08712	4.94774	0.00011819	0.0293429	1.34348	111	1.43109	NA	NA	NA	10	---	NA	4.41297	4.37416	4.98575	3.67218	4.36663	4.24428	3.74784	3.97437	4.12487	3.68271	4.33418	3.83496
15306302	chr6:-:96120922-96120992	NA	NA	0.511792	11.6965	7.05638	1.80305e-06	0.00308605	5.11609	15	1.42582	NA	NA	NA	18	---	NA	12.1249	12.0568	12.0594	11.3642	12.0844	11.9999	11.5485	11.7099	11.6398	11.735	11.7786	11.1624
15200779	chr10:+:34192021-34192325	NA	NA	0.505903	9.22256	4.6784	0.000209519	0.0387512	0.818096	149	1.42001	NA	NA	NA	15	---	NA	9.18601	9.37872	9.40708	9.09977	9.17504	9.32962	8.82438	8.80708	8.89465	8.44179	9.35707	8.85055
15319510	chr7:-:133225520-133226158	CDCA4	CDCA4	0.499224	4.02396	6.25223	8.29824e-06	0.00635231	3.68713	36	1.41345	cell division cycle associated 4	XM_005656478	PREDICTED: Sus scrofa cell division cycle associated 4 (CDCA4), transcript variant X2, mRNA.	22	---	ENSSSCT00000002844	4.24106	4.27992	4.16747	4.25458	4.03539	4.24792	3.75789	3.63013	4.0972	4.27243	3.98779	3.65421
15201059	chr10:+:46835913-46886624	PDSS1	LOC100622080	0.49234	5.58789	4.28402	0.000489826	0.0499909	0.0320733	270	1.40672	decaprenyl-diphosphate synthase subunit 1-like	XM_005658598	PREDICTED: Sus scrofa decaprenyl-diphosphate synthase subunit 1-like (LOC100622080), transcript variant X3, mRNA.	30	XM_005668142 // GO:0008299 // isoprenoid biosynthetic process // inferred from electronic annotation /// ENSSSCT00000012105 // GO:0008299 // isoprenoid biosynthetic process // inferred from electronic annotation /// ENSSSCT00000027318 // GO:0008299 // isoprenoid biosynthetic process // inferred from electronic annotation	ENSSSCT00000012105 ENSSSCT00000027318	5.54276	5.56845	5.57362	5.50561	5.77115	5.92977	5.50929	5.31788	5.02618	5.52504	5.4516	4.90803
15192618	chr1:-:33648789-33649034	AKAP7	AKAP7	0.491267	5.30757	4.45767	0.000336542	0.0446505	0.379421	203	1.40568	A kinase (PRKA) anchor protein 7	XM_013992544	PREDICTED: Sus scrofa A kinase (PRKA) anchor protein 7 (AKAP7), partial mRNA.	22	---	NA	5.37037	5.48207	5.6403	5.29655	5.49483	5.58471	4.87549	5.87372	5.38087	5.29041	4.97711	4.96034
15308040	chr7:+:23202192-23203124	OR2B8P	LOC100154533	0.477933	2.72698	5.063	9.27089e-05	0.0268934	1.56927	95	1.39275	putative olfactory receptor 2B8	XM_001927417	PREDICTED: Sus scrofa putative olfactory receptor 2B8 (LOC100154533), mRNA.	8	ENSSSCT00000001288 // GO:0007165 // signal transduction // inferred from electronic annotation /// ENSSSCT00000001288 // GO:0007186 // G-protein coupled receptor signaling pathway // inferred from electronic annotation /// ENSSSCT00000001288 // GO:0007608 // sensory perception of smell // inferred from electronic annotation /// ENSSSCT00000001288 // GO:0050896 // response to stimulus // inferred …	ENSSSCT00000001288	3.01904	2.87668	3.18649	3.0043	2.94303	2.96596	2.5747	2.31703	2.58746	3.10185	2.48006	2.68429
15269065	chr3:+:23944206-23961556	CLEC19A	CLEC19A	0.477392	5.25101	6.3065	7.46514e-06	0.00621724	3.85662	32	1.39222	C-type lectin domain family 19, member A	XM_013987722	PREDICTED: Sus scrofa C-type lectin domain family 19, member A (CLEC19A), mRNA.	25	---	ENSSSCT00000008625	5.38638	5.53043	5.69016	5.04258	5.50681	5.49376	5.43203	4.99025	5.16093	5.16579	5.24878	4.99084
15265513	---:---:-------	NA	NA	0.476491	8.33258	4.66634	0.000214992	0.0389354	0.791303	151	1.39136	NA	NA	NA	2	---	NA	8.43585	8.82419	8.51555	8.45311	8.21772	8.63282	7.92627	7.98101	8.37505	8.34877	8.12311	8.03327
15214375	chr12:-:56174113-56174185	NA	NA	0.474705	8.35932	5.69386	2.52068e-05	0.0135638	2.76486	51	1.38963	NA	NA	NA	24	---	NA	8.67593	8.48393	8.37995	8.55963	8.47465	8.48104	7.92269	7.84553	8.42388	8.36523	8.26796	8.80084
15288017	chr5:+:17027793-17050650	ESPL1	ESPL1	0.471506	3.99932	4.85327	0.000144359	0.0325384	1.16088	122	1.38656	extra spindle pole bodies like 1, separase	XM_013986230	PREDICTED: Sus scrofa extra spindle pole bodies like 1, separase (ESPL1), transcript variant X1, mRNA.	29	ENSSSCT00000000284 // GO:0007059 // chromosome segregation // inferred from electronic annotation /// ENSSSCT00000000284 // GO:0000070 // mitotic sister chromatid segregation // inferred from electronic annotation /// ENSSSCT00000000284 // GO:0000212 // meiotic spindle organization // inferred from electronic annotation /// ENSSSCT00000000284 // GO:0006508 // proteolysis // inferred from electron…	ENSSSCT00000000284	4.17177	4.1977	4.1393	4.12049	4.31679	4.22492	3.70675	3.66638	4.04527	4.20498	3.9299	3.62352
15245837	chr17:+:15079561-15080376	BMP2	BMP2	0.470772	6.17362	4.74511	0.000181701	0.037167	0.949137	132	1.38585	bone morphogenetic protein 2	XM_013985060	PREDICTED: Sus scrofa bone morphogenetic protein 2 (BMP2), transcript variant X1, mRNA.	16	XM_013985060 // GO:0040007 // growth // inferred from electronic annotation /// ENSSSCT00000007726 // GO:0040007 // growth // inferred from electronic annotation /// ENSSSCT00000007726 // GO:0000122 // negative regulation of transcription from RNA polymerase II promoter // --- /// ENSSSCT00000007726 // GO:0010862 // positive regulation of pathway-restricted SMAD protein phosphorylation // --- ///…	ENSSSCT00000007726	6.50344	6.53487	6.33325	6.57542	6.42836	6.784	6.39891	6.01233	6.22314	6.41005	5.9267	6.07078
15224248	chr14:+:31896749-31930523	RAD9B	RAD9B	0.467443	4.1753	4.29726	0.000475974	0.0492946	0.057406	265	1.38266	RAD9 checkpoint clamp component B	XM_005670641	PREDICTED: Sus scrofa RAD9 checkpoint clamp component B (RAD9B), transcript variant X1, mRNA.	28	ENSSSCT00000010767 // GO:0000075 // cell cycle checkpoint // inferred from electronic annotation /// ENSSSCT00000010767 // GO:0000077 // DNA damage checkpoint // inferred from electronic annotation /// ENSSSCT00000010767 // GO:0006281 // DNA repair // inferred from electronic annotation /// ENSSSCT00000010767 // GO:0000076 // DNA replication checkpoint // --- /// ENSSSCT00000010767 // GO:0006281 …	ENSSSCT00000010767 ENSSSCT00000027736 ENSSSCT00000030796	4.21256	3.84516	4.31688	4.22534	4.54884	4.7029	3.62073	4.14334	4.07572	4.17023	4.14065	3.74903
15343073	g335286593:+:1-820	NA	LOC100518120	0.447737	4.97564	4.6113	0.000241884	0.0389354	0.685635	171	1.3639	NA	XR_001303421	PREDICTED: Sus scrofa uncharacterized LOC100518120 (LOC100518120), ncRNA.	25	---	NA	5.19645	5.51818	5.27243	5.37692	5.18923	4.8024	4.82442	4.42116	4.93465	5.02127	5.06647	5.07157
15293627	chr5:-:53430169-53430275	NA	NA	0.441294	4.81465	5.13886	7.9078e-05	0.0239476	1.71487	91	1.35782	NA	NA	NA	17	---	NA	5.45513	5.11287	5.25518	4.59484	4.99851	5.00984	4.55205	4.61597	5.07055	4.81023	4.78452	4.73604
15290940	chr5:+:100041336-100063703	TTLL8	TTLL8	0.439226	5.54923	5.80279	2.02302e-05	0.011661	2.96271	47	1.35588	tubulin tyrosine ligase-like family member 8	XM_013994093	PREDICTED: Sus scrofa tubulin tyrosine ligase-like family member 8 (TTLL8), partial mRNA.	26	ENSSSCT00000001072 // GO:0006464 // cellular protein modification process // inferred from electronic annotation /// ENSSSCT00000001072 // GO:0042384 // cilium assembly // inferred from electronic annotation /// ENSSSCT00000001072 // GO:0018094 // protein polyglycylation // inferred from electronic annotation	ENSSSCT00000001072	5.30947	5.83845	5.92731	5.76294	5.77661	5.79687	5.39838	5.33091	5.43546	5.4953	5.76158	5.37714
15182929	---:---:-------	NA	NA	0.438902	5.4345	5.04494	9.62958e-05	0.0273087	1.5193	98	1.35557	NA	NA	NA	4	---	NA	5.54247	5.60038	5.5277	5.54521	5.86884	5.29171	5.18492	5.04518	5.32872	5.08066	5.38356	5.45788
15225517	chr14:+:50623355-50626970	LRRC75B	LRRC75B	0.436929	4.27973	4.51992	0.000294328	0.0429159	0.505852	189	1.35372	NA	XM_013983124	PREDICTED: Sus scrofa leucine rich repeat containing 75B (LRRC75B), transcript variant X1, mRNA.	20	---	NA	3.9459	4.64177	4.72372	4.67526	4.45349	4.65844	4.08275	4.31543	4.4384	4.30231	3.73289	4.2447
15180493	---:---:-------	NA	NA	0.435314	8.13465	4.54724	0.000277538	0.0412174	0.558136	185	1.35221	NA	NA	NA	4	---	NA	8.21205	8.38409	8.19625	8.29307	8.50802	8.33931	7.96612	7.64496	8.28807	8.10032	7.81416	8.20995
15252140	chr18:-:8633820-8634119	NA	NA	0.434074	5.08674	4.84671	0.000146384	0.0325384	1.14834	123	1.35104	NA	NA	NA	15	---	NA	5.64891	4.73825	4.85966	5.14134	5.30766	5.24516	4.66719	4.78944	4.80175	5.12746	5.02762	4.67158
15350845	g335310808:+:1-2416	CDH16	CDH16	0.431827	5.06237	4.51389	0.00029817	0.0429727	0.491132	191	1.34894	NA	XM_013992359	PREDICTED: Sus scrofa cadherin 16, KSP-cadherin (CDH16), mRNA.	25	---	NA	4.91238	5.41538	5.53611	5.40908	5.30229	5.22691	4.93557	5.0147	4.88221	5.36962	4.97544	4.80639
15350067	g335309381:+:1-1083	NA	NA	0.431277	4.08118	4.60913	0.00024301	0.0389354	0.681187	172	1.34843	NA	NA	NA	10	---	NA	4.51932	4.79386	4.47404	4.45706	4.3982	4.30537	3.97689	4.25023	4.44191	3.89971	4.33176	3.94947
15334533	chrX:+:82148279-82148653	TCEAL4	TCEAL4	0.428789	8.38319	5.05039	9.51978e-05	0.0273087	1.54652	96	1.3461	transcription elongation factor A (SII)-like 4	XM_003135283	PREDICTED: Sus scrofa transcription elongation factor A (SII)-like 4 (TCEAL4), transcript variant X1, mRNA.	8	XM_003135283 // GO:0006357 // regulation of transcription from RNA polymerase II promoter // --- /// XM_005657895 // GO:0006357 // regulation of transcription from RNA polymerase II promoter // --- /// ENSSSCT00000013699 // GO:0006357 // regulation of transcription from RNA polymerase II promoter // --- /// ENSSSCT00000034136 // GO:0006357 // regulation of transcription from RNA polymerase II pro…	ENSSSCT00000013699 ENSSSCT00000034136	8.69257	8.96835	8.83688	8.21219	8.69035	8.69429	8.34651	8.20963	8.37991	8.64948	8.36673	8.37914
15305211	chr6:-:58242835-58254520	MAP3K6	MAP3K6	0.425233	4.92966	4.68625	0.000206032	0.0385977	0.833502	147	1.34279	mitogen-activated protein kinase kinase kinase 6	XM_013988796	PREDICTED: Sus scrofa mitogen-activated protein kinase kinase kinase 6 (MAP3K6), mRNA.	22	ENSSSCT00000003967 // GO:0006468 // protein phosphorylation // inferred from electronic annotation /// ENSSSCT00000003967 // GO:0016310 // phosphorylation // inferred from electronic annotation /// ENSSSCT00000003967 // GO:0000165 // MAPK cascade // --- /// ENSSSCT00000003967 // GO:0000186 // activation of MAPKK activity // --- /// ENSSSCT00000003967 // GO:0007346 // regulation of mitotic cell cy…	ENSSSCT00000003967 ENSSSCT00000033426 ENSSSCT00000033917	5.13329	5.18214	5.16356	5.20208	5.00233	4.7217	4.70822	4.55867	4.65329	4.76525	5.39773	4.72474
15345831	g335296145:+:1-1379	SDCCAG8	SDCCAG8	0.419404	6.08054	4.27112	0.000503717	0.0502951	-0.00147975	276	1.33738	NA	XM_003130560	PREDICTED: Sus scrofa serologically defined colon cancer antigen 8 (SDCCAG8), partial mRNA.	25	---	NA	6.45422	6.31948	6.32252	6.20967	5.90564	6.48258	5.77011	5.99378	6.02287	6.1739	5.95674	5.99447
15184204	chr1:+:46880930-46881256	RPLP1	LOC100523874	0.41928	3.33426	5.72877	2.34875e-05	0.0129454	2.7987	50	1.33726	60S acidic ribosomal protein P1 pseudogene	XR_001301948	PREDICTED: Sus scrofa 60S acidic ribosomal protein P1 pseudogene (LOC100523874), misc_RNA.	12	ENSSSCT00000004710 // GO:0006412 // translation // inferred from electronic annotation /// ENSSSCT00000004710 // GO:0006414 // translational elongation // inferred from electronic annotation	ENSSSCT00000004710	3.54608	3.62276	3.62007	3.19524	3.87488	3.57495	3.14151	3.14393	3.42282	2.93684	3.53347	3.40991
15221960	chr13:-:93955775-93962580	CRYGS	CRYGS	0.415685	4.89394	4.95609	0.000116123	0.0293429	1.36218	108	1.33393	crystallin, gamma S	XM_001926147	PREDICTED: Sus scrofa crystallin, gamma S (CRYGS), mRNA.	24	ENSSSCT00000012908 // GO:0002009 // morphogenesis of an epithelium // inferred from electronic annotation /// ENSSSCT00000012908 // GO:0002088 // lens development in camera-type eye // inferred from electronic annotation	ENSSSCT00000012908	4.80991	5.11042	5.14376	5.08436	4.55658	5.13749	4.57332	4.86543	4.75749	4.75672	4.75146	4.65837
15274698	chr3:-:35788535-35788641	NA	NA	0.413474	5.84099	4.88958	0.000133662	0.0315338	1.23242	115	1.33189	NA	NA	NA	12	---	NA	6.12626	6.09614	6.15415	6.09843	5.99092	6.2213	5.87544	5.60581	5.85483	5.7867	5.72318	5.79149
15268642	chr3:+:16035733-16039070	CTF2	LOC100736868	0.40614	4.35417	5.49376	3.79038e-05	0.0177632	2.3893	58	1.32514	cardiotrophin-2-like	XM_013995587	PREDICTED: Sus scrofa cardiotrophin-2-like (LOC100736868), mRNA.	24	ENSSSCT00000008520 // GO:0040007 // growth // inferred from electronic annotation /// ENSSSCT00000008520 // GO:0008284 // positive regulation of cell proliferation // inferred from electronic annotation /// ENSSSCT00000008520 // GO:0007166 // cell surface receptor signaling pathway // ---	ENSSSCT00000008520	4.55537	4.66162	4.58978	4.43122	4.61071	4.79104	4.2992	4.2651	4.36827	4.28574	4.33049	3.89728
15345231	g335294014:+:1-1354	NA	NA	0.406129	4.99299	5.47004	3.97955e-05	0.0177632	2.34509	60	1.32513	NA	NA	NA	25	---	NA	4.8789	5.31664	5.28229	5.16277	5.33037	5.47022	4.83147	5.02032	5.19538	4.90921	4.98263	4.83397
15345233	g335294018:+:1-1354	NA	NA	0.406129	4.99299	5.47004	3.97955e-05	0.0177632	2.34509	61	1.32513	NA	NA	NA	25	---	NA	4.8789	5.31664	5.28229	5.16277	5.33037	5.47022	4.83147	5.02032	5.19538	4.90921	4.98263	4.83397
15343403	g335288271:+:1-572	GLIPR1L1	GLIPR1L1	0.402776	2.8167	4.41302	0.000370572	0.0463088	0.290635	220	1.32205	NA	XM_003355522	PREDICTED: Sus scrofa GLI pathogenesis-related 1 like 1 (GLIPR1L1), mRNA.	25	---	NA	2.96441	2.99154	3.07588	2.66102	3.26444	2.9888	2.64735	2.54189	2.82833	3.08293	2.6682	2.47972
15317909	chr7:-:85317558-85318481	OR4N5	LOC100152712	0.401002	3.68264	4.61414	0.000240416	0.0389354	0.691887	168	1.32042	olfactory receptor 4N5	XM_005656318	PREDICTED: Sus scrofa olfactory receptor 4N5 (LOC100152712), transcript variant X1, mRNA.	12	XM_005656318 // GO:0007165 // signal transduction // inferred from electronic annotation /// XM_005656318 // GO:0007186 // G-protein coupled receptor signaling pathway // --- /// XM_005656318 // GO:0007186 // G-protein coupled receptor signaling pathway // inferred from electronic annotation /// XM_005656318 // GO:0007608 // sensory perception of smell // inferred from electronic annotation /// X…	ENSSSCT00000002414	4.2743	4.18181	3.75618	4.16926	4.12842	3.39491	3.70357	3.68935	3.66672	3.68	4.32872	3.7578
15211694	chr12:-:19059691-19060158	LAGE3	LOC100515685	0.393258	8.69751	4.49295	0.000311913	0.0438556	0.444777	196	1.31336	NA	XM_005653904	PREDICTED: Sus scrofa EKC/KEOPS complex subunit LAGE3-like (LOC100515685), mRNA.	25	---	NA	8.79929	9.14253	9.23103	8.92338	8.85065	8.89613	8.64189	8.49331	8.80844	8.62761	8.74031	8.64997
15346469	g335298073:+:1-525	NA	LOC100623319	0.390308	3.14853	4.96965	0.000112846	0.0293159	1.38878	106	1.31067	NA	XM_013989943	PREDICTED: Sus scrofa uncharacterized protein C17orf78 homolog (LOC100623319), mRNA.	25	---	NA	3.23866	3.4451	3.05397	3.32664	3.61642	3.17605	3.09357	2.89847	3.0537	3.00529	3.19956	2.84051
15239536	chr15:-:63447033-63473533	PSMD14	PSMD14	0.387755	7.62727	4.74159	0.000183072	0.037167	0.942048	133	1.30836	NA	XM_003359536	PREDICTED: Sus scrofa proteasome 26S subunit, non-ATPase 14 (PSMD14), transcript variant X1, mRNA.	22	---	NA	7.89542	7.82011	7.82692	8.19856	7.31094	7.81912	7.46707	7.32821	8.03132	7.62229	7.42338	7.47891
15293012	chr5:-:30644817-30965514	GRIP1	GRIP1	0.386604	4.19121	4.32808	0.000445253	0.0484992	0.125953	249	1.30731	glutamate receptor interacting protein 1	XM_013997700	PREDICTED: Sus scrofa glutamate receptor interacting protein 1 (GRIP1), transcript variant X1, mRNA.	23	ENSSSCT00000000516 // GO:0008104 // protein localization // inferred from electronic annotation /// ENSSSCT00000000516 // GO:0016358 // dendrite development // inferred from electronic annotation /// ENSSSCT00000033391 // GO:0016358 // dendrite development // inferred from electronic annotation	ENSSSCT00000000516 ENSSSCT00000033391	4.47762	4.11195	4.34359	4.27869	4.29363	4.4548	3.69164	3.96828	4.35055	4.15878	4.1678	3.93794
15259845	chr2:+:130198288-130201115	RELL2	RELL2	0.380888	5.52727	4.51271	0.00029893	0.0429727	0.491442	190	1.30214	RELT-like 2	XM_003124038	PREDICTED: Sus scrofa RELT-like 2 (RELL2), transcript variant X3, mRNA.	18	XM_003124038 // GO:0010811 // positive regulation of cell-substrate adhesion // inferred from electronic annotation /// XM_005661770 // GO:0010811 // positive regulation of cell-substrate adhesion // inferred from electronic annotation /// XM_005661771 // GO:0010811 // positive regulation of cell-substrate adhesion // inferred from electronic annotation /// ENSSSCT00000015726 // GO:0010811 // pos…	ENSSSCT00000015726	5.68724	5.72984	6.01904	5.4696	5.558	5.66219	5.11246	5.28163	5.62772	5.17721	5.63618	5.53955
15325833	chr9:+:38652878-38665903	SDHD	SDHD	0.374921	5.15839	4.55998	0.000270042	0.0412174	0.585404	180	1.29677	succinate dehydrogenase complex, subunit D, integral membrane protein	NA	NA	9	ENSSSCT00000016399 // GO:0006099 // tricarboxylic acid cycle // inferred from electronic annotation /// ENSSSCT00000016399 // GO:0050433 // regulation of catecholamine secretion // inferred from electronic annotation /// ENSSSCT00000016399 // GO:0071456 // cellular response to hypoxia // inferred from electronic annotation /// ENSSSCT00000016399 // GO:0006099 // tricarboxylic acid cycle // --- //…	ENSSSCT00000016399	5.49661	5.30606	5.35083	5.16314	5.44367	5.40926	4.9531	5.22315	5.02786	4.83837	5.86978	4.93761
15279603	chr4:+:87782046-88038916	FAM78B	FAM78B	0.373188	4.34038	4.3048	0.00046827	0.0492946	0.0684473	261	1.29521	family with sequence similarity 78, member B	XM_001925709	PREDICTED: Sus scrofa family with sequence similarity 78, member B (FAM78B), mRNA.	22	---	ENSSSCT00000006928	4.75191	4.61694	4.70455	4.42009	4.63579	4.10278	4.17825	4.11866	4.24087	4.50755	4.38002	4.31466
15191247	chr1:+:285905408-285921415	PRDM12	PRDM12	0.371755	5.81181	5.18978	7.10952e-05	0.0229989	1.81504	85	1.29393	PR domain containing 12	XM_003122237	PREDICTED: Sus scrofa PR domain containing 12 (PRDM12), mRNA.	24	ENSSSCT00000006272 // GO:0022008 // neurogenesis // inferred from electronic annotation	ENSSSCT00000006272	6.05875	6.22809	6.03504	6.04949	6.07788	5.91794	5.74473	5.52772	5.99525	5.75943	5.82333	5.90364
15236711	chr15:+:77003158-77004980	HOXD13	HOXD13	0.368299	4.68035	4.64469	0.000225184	0.0389354	0.751551	157	1.29083	homeobox D13	XM_003483680	PREDICTED: Sus scrofa homeobox D13 (HOXD13), mRNA.	22	XM_003483680 // GO:0001501 // skeletal system development // inferred from electronic annotation /// XM_003483680 // GO:0006355 // regulation of transcription, DNA-templated // inferred from electronic annotation /// XM_003483680 // GO:0006366 // transcription from RNA polymerase II promoter // inferred from electronic annotation /// XM_003483680 // GO:0007389 // pattern specification process // …	ENSSSCT00000017400	4.59444	4.98963	4.85702	4.91752	4.39475	4.84187	4.88528	4.39803	4.61247	4.74351	4.57874	4.39724
15232809	chr14:-:79769816-79769890	NA	NA	0.368293	9.14668	4.50976	0.000300829	0.0429727	0.483848	192	1.29083	NA	NA	NA	11	---	NA	9.29886	9.25226	9.22416	8.94349	9.58236	9.14664	8.78718	8.93457	9.08784	9.01277	9.00289	9.39836
15345305	g335294255:+:1-2731	NA	LOC100524097	0.360941	3.65002	4.58282	0.000257122	0.0404308	0.629864	175	1.28426	NA	XM_013998970	PREDICTED: Sus scrofa uncharacterized LOC100524097 (LOC100524097), mRNA.	25	---	NA	3.35496	3.7424	3.94886	3.68333	4.14842	3.86659	3.32192	3.49164	3.57594	3.61268	3.70128	4.00613
15271108	chr3:+:66198631-66206792	SNRPG	SNRPG	0.359825	7.86199	4.90198	0.000130197	0.0314734	1.25701	114	1.28327	small nuclear ribonucleoprotein polypeptide G	XM_003125052	PREDICTED: Sus scrofa small nuclear ribonucleoprotein polypeptide G (SNRPG), mRNA.	25	XM_003125052 // GO:0000387 // spliceosomal snRNP assembly // inferred from electronic annotation /// XM_003125052 // GO:0000398 // mRNA splicing, via spliceosome // --- /// XM_003125052 // GO:0000398 // mRNA splicing, via spliceosome // inferred from electronic annotation /// XM_003125052 // GO:0008334 // histone mRNA metabolic process // --- /// XM_003125052 // GO:0031124 // mRNA 3'-end processi…	NA	8.11653	8.03321	7.92434	8.0453	7.64131	8.02871	7.70577	7.49999	7.9318	7.66934	7.74539	7.80489
15340945	g311275314:+:1-2384	NA	NA	0.357389	4.44394	4.34416	0.000430025	0.0483699	0.158407	244	1.28111	NA	NA	NA	16	---	NA	4.72695	4.6358	4.71911	4.59535	4.51129	4.74348	3.96168	4.32787	4.59644	4.50692	4.24144	4.76226
15229277	chr14:-:768928-935245	LOC102164918	LOC102164918	0.35547	4.67281	4.36458	0.000411454	0.0476422	0.186635	239	1.2794	uncharacterized LOC102164918	XR_307310	PREDICTED: Sus scrofa uncharacterized LOC102164918 (LOC102164918), ncRNA.	34	---	NA	4.75628	5.01962	4.96556	4.63532	4.86399	4.96247	4.45646	4.60439	4.68534	4.70808	4.6276	4.5783
15256825	chr2:+:53185642-53188601	ZGLP1	ZGLP1	0.351342	5.58144	4.50716	0.000302515	0.0429727	0.479433	193	1.27575	zinc finger, GATA-like protein 1	XM_013987414	PREDICTED: Sus scrofa zinc finger, GATA-like protein 1 (ZGLP1), mRNA.	31	ENSSSCT00000029300 // GO:0000122 // negative regulation of transcription from RNA polymerase II promoter // inferred from electronic annotation /// ENSSSCT00000029300 // GO:0006355 // regulation of transcription, DNA-templated // inferred from electronic annotation /// ENSSSCT00000029300 // GO:0007283 // spermatogenesis // inferred from electronic annotation /// ENSSSCT00000029300 // GO:0048599 /…	ENSSSCT00000029300 ENSSSCT00000030760	5.55297	5.90135	5.87034	5.68672	5.8512	5.83385	5.51547	5.44431	5.39885	5.956	5.55436	5.37833
15264145	chr2:-:53011575-53014534	ZGLP1	ZGLP1	0.351342	5.58144	4.50716	0.000302515	0.0429727	0.479433	194	1.27575	NA	XM_013987414	PREDICTED: Sus scrofa zinc finger, GATA-like protein 1 (ZGLP1), mRNA.	31	ENSSSCT00000029300 // GO:0000122 // negative regulation of transcription from RNA polymerase II promoter // inferred from electronic annotation /// ENSSSCT00000029300 // GO:0006355 // regulation of transcription, DNA-templated // inferred from electronic annotation /// ENSSSCT00000029300 // GO:0007283 // spermatogenesis // inferred from electronic annotation /// ENSSSCT00000029300 // GO:0048599 /…	NA	5.55297	5.90135	5.87034	5.68672	5.8512	5.83385	5.51547	5.44431	5.39885	5.956	5.55436	5.37833
15245460	chr17:+:640892-683076	TRMT9B	LOC100620887	0.346142	4.23615	4.31305	0.00045998	0.0490807	0.0867765	258	1.27116	probable tRNA methyltransferase 9-like protein	XM_005658051	PREDICTED: Sus scrofa probable tRNA methyltransferase 9-like protein (LOC100620887), mRNA.	24	ENSSSCT00000007634 // GO:0008152 // metabolic process // inferred from electronic annotation /// ENSSSCT00000007634 // GO:0032259 // methylation // inferred from electronic annotation	ENSSSCT00000007634	4.25843	4.31251	4.25984	4.39702	4.34153	4.45407	3.92087	3.93905	4.26011	4.16524	4.27468	3.97465
15325192	chr9:+:9401960-9402104	NA	NA	0.343392	9.15386	4.38863	0.000390608	0.047587	0.244251	223	1.26874	NA	NA	NA	25	---	NA	9.1772	8.92638	8.89526	9.26873	9.38549	9.18077	8.79987	8.82785	8.99826	8.88397	9.11267	9.60922
15329473	chr9:-:9324449-9324593	NA	NA	0.343392	9.15386	4.38863	0.000390608	0.047587	0.244251	224	1.26874	NA	NA	NA	25	---	NA	9.1772	8.92638	8.89526	9.26873	9.38549	9.18077	8.79987	8.82785	8.99826	8.88397	9.11267	9.60922
15344181	g335290444:+:1-831	NA	NA	0.343302	5.98909	4.29924	0.000473938	0.0492946	0.0646173	263	1.26866	NA	NA	NA	23	---	NA	6.10881	6.09398	6.14064	5.94426	6.16029	6.20014	6.11279	5.72968	6.06423	5.71033	6.09576	5.65277
15349607	g335308252:+:1-2581	NA	LOC102165296	0.34288	6.66385	4.55718	0.000271674	0.0412174	0.57653	181	1.26829	NA	XR_302983	PREDICTED: Sus scrofa uncharacterized LOC102165296 (LOC102165296), ncRNA.	30	---	NA	6.93548	7.14393	6.97415	6.81891	6.6333	6.88981	6.57337	6.35546	6.6915	6.7978	6.68197	6.61922
15343521	g335288689:+:1-1655	NA	NA	0.341672	5.14014	4.92068	0.000125146	0.0305201	1.29161	113	1.26722	NA	NA	NA	25	---	NA	4.91092	5.4658	5.49752	4.93837	5.2895	5.39366	4.98209	5.03074	5.00533	5.11404	5.24006	4.98252
15205557	chr11:-:67258242-67258955	HS6ST3	LOC100620744	0.339123	5.42087	4.4852	0.000317165	0.0443296	0.437915	197	1.26499	heparan-sulfate 6-O-sulfotransferase 3	XM_005668498	PREDICTED: Sus scrofa heparan-sulfate 6-O-sulfotransferase 3 (LOC100620744), mRNA.	16	ENSSSCT00000010421 // GO:0015015 // heparan sulfate proteoglycan biosynthetic process, enzymatic modification // inferred from electronic annotation /// ENSSSCT00000010421 // GO:0015015 // heparan sulfate proteoglycan biosynthetic process, enzymatic modification // ---	ENSSSCT00000010421	4.84575	5.64735	5.87272	5.61502	5.80959	5.7212	5.41475	5.29571	5.6735	5.22404	5.45507	5.38505
15293836	chr5:-:59585661-59591366	GDF3	GDF3	0.338998	4.00866	4.64114	0.000226904	0.0389354	0.740207	158	1.26488	growth differentiation factor 3	XM_003126512	PREDICTED: Sus scrofa growth differentiation factor 3 (GDF3), mRNA.	23	ENSSSCT00000000725 // GO:0001501 // skeletal system development // inferred from electronic annotation /// ENSSSCT00000000725 // GO:0001654 // eye development // inferred from electronic annotation /// ENSSSCT00000000725 // GO:0001701 // in utero embryonic development // inferred from electronic annotation /// ENSSSCT00000000725 // GO:0002021 // response to dietary excess // inferred from electro…	ENSSSCT00000000725	4.16326	4.24039	4.1942	4.18877	4.32603	4.35436	3.99727	3.83868	4.09171	4.09854	4.01766	3.88474
15207949	chr12:+:22441194-22444602	HOXB9	HOXB9	0.335567	4.27153	4.37868	0.000399104	0.047587	0.216734	231	1.26187	homeobox B9	XM_003131555	PREDICTED: Sus scrofa homeobox B9 (HOXB9), transcript variant X2, mRNA.	23	XM_003131555 // GO:0006351 // transcription, DNA-templated // inferred from electronic annotation /// XM_003131555 // GO:0006355 // regulation of transcription, DNA-templated // inferred from electronic annotation /// XM_003131555 // GO:0009952 // anterior/posterior pattern specification // inferred from electronic annotation /// XM_003131555 // GO:0030879 // mammary gland development // inferred…	ENSSSCT00000019090	4.46214	4.32897	4.7376	4.29374	4.36769	4.43942	4.1014	4.14258	4.15187	4.24352	4.29524	4.09202
15271448	---:---:-------	NA	NA	0.332213	10.8739	6.38621	6.39549e-06	0.00583715	3.9932	29	1.25894	NA	NA	NA	5	---	NA	11.2877	10.9509	10.9481	10.9678	10.9481	10.9507	10.6076	10.9198	10.8857	10.7758	10.7174	10.6691
15252651	chr18:-:21780086-21787778	HYAL4	LOC100524837	0.325936	3.43682	4.58495	0.000255949	0.0404308	0.633213	174	1.25348	hyaluronidase-4	XM_003134724	PREDICTED: Sus scrofa hyaluronidase-4 (LOC100524837), transcript variant X1, mRNA.	24	ENSSSCT00000018075 // GO:0008152 // metabolic process // inferred from electronic annotation /// ENSSSCT00000018075 // GO:0005975 // carbohydrate metabolic process // inferred from electronic annotation /// ENSSSCT00000018075 // GO:0030207 // chondroitin sulfate catabolic process // inferred from electronic annotation	ENSSSCT00000018075	3.49781	3.7207	4.02393	3.63281	3.56273	3.71196	3.37582	3.43525	3.4823	3.50271	3.4427	2.98368
15250017	chr17:-:61277495-61326144	APCDD1L	APCDD1L	0.322153	6.30021	4.44502	0.000345852	0.0446505	0.354325	212	1.25019	adenomatosis polyposis coli down-regulated 1-like	XM_013985490	PREDICTED: Sus scrofa adenomatosis polyposis coli down-regulated 1-like (APCDD1L), mRNA.	23	---	ENSSSCT00000008232	6.24375	6.59119	6.42921	6.60589	6.52653	6.52497	6.15913	6.16965	6.28581	6.28146	6.61877	6.1244
15220887	chr13:-:55493306-55493842	FANCD2OS	FANCD2OS	0.322103	4.66134	4.55199	0.00027472	0.0412174	0.569628	183	1.25015	FANCD2 opposite strand	XM_003483213	PREDICTED: Sus scrofa FANCD2 opposite strand (FANCD2OS), transcript variant X2, mRNA.	23	---	NA	4.33484	4.80518	4.99475	4.90201	5.14719	5.10786	4.46202	4.67526	4.64117	4.99432	4.6533	4.63981
15184513	chr1:+:60675305-60678183	LYRM2	LYRM2	0.31923	8.44733	4.55587	0.00027244	0.0412174	0.57538	182	1.24766	NA	XM_003121299	PREDICTED: Sus scrofa LYR motif containing 2 (LYRM2), mRNA.	22	---	ENSSSCT00000004780	8.64649	8.42356	8.60415	8.66369	8.54788	8.59711	8.31653	8.21737	8.35141	8.35	8.42992	8.5358
15322009	chr8:+:119218036-119219746	GK2	GK2	0.3171	4.41352	5.43283	4.29597e-05	0.0182136	2.27652	64	1.24582	glycerol kinase 2	XM_003129373	PREDICTED: Sus scrofa glycerol kinase 2 (GK2), mRNA.	19	XM_003129373 // GO:0005975 // carbohydrate metabolic process // inferred from electronic annotation /// XM_003129373 // GO:0006071 // glycerol metabolic process // --- /// XM_003129373 // GO:0006072 // glycerol-3-phosphate metabolic process // inferred from electronic annotation /// XM_003129373 // GO:0006641 // triglyceride metabolic process // --- /// XM_003129373 // GO:0016310 // phosphorylati…	ENSSSCT00000010137	4.48096	4.93483	4.71214	4.64286	4.6139	4.60474	4.27933	4.3451	4.48388	4.44674	4.5273	4.35442
15286773	chr4:-:127718031-127718147	NA	NA	0.317045	6.05416	4.3758	0.000401593	0.047587	0.216053	232	1.24578	NA	NA	NA	25	---	NA	5.86236	6.25113	6.29623	6.3223	6.23755	6.36057	5.80935	6.02242	5.99474	6.04257	6.31332	5.98271
15261873	chr2:-:10799336-10800277	OR5B2	LOC100511620	0.314081	2.66768	4.7111	0.000195379	0.0380828	0.877147	138	1.24322	NA	XM_013994296	PREDICTED: Sus scrofa olfactory receptor 5B2-like (LOC100511620), mRNA.	10	ENSSSCT00000014382 // GO:0007165 // signal transduction // inferred from electronic annotation /// ENSSSCT00000014382 // GO:0007186 // G-protein coupled receptor signaling pathway // inferred from electronic annotation /// ENSSSCT00000014382 // GO:0007608 // sensory perception of smell // inferred from electronic annotation /// ENSSSCT00000014382 // GO:0050896 // response to stimulus // inferred …	ENSSSCT00000014382	2.92561	2.9422	2.9842	2.64015	2.95651	3.00252	2.65949	2.19894	2.78484	2.90973	2.48742	2.64507
15342473	g335284392:+:1-3134	SEZ6L2	SEZ6L2	0.312929	4.67818	4.95579	0.000116196	0.0293429	1.35338	109	1.24223	NA	XM_003354543	PREDICTED: Sus scrofa seizure related 6 homolog (mouse)-like 2 (SEZ6L2), transcript variant X1, mRNA.	25	---	NA	4.88945	4.79362	4.76717	4.89287	4.78773	4.72659	4.46187	5.14407	4.70905	4.70385	4.68769	4.15654
15298563	chr6:+:48643530-48646629	FBXO2	FBXO2	0.312801	5.41852	4.37494	0.000402343	0.047587	0.21931	229	1.24212	F-box protein 2	XM_013998979	PREDICTED: Sus scrofa F-box protein 2 (FBXO2), mRNA.	25	ENSSSCT00000029474 // GO:0006511 // ubiquitin-dependent protein catabolic process // inferred from electronic annotation /// ENSSSCT00000029474 // GO:0006516 // glycoprotein catabolic process // inferred from electronic annotation /// ENSSSCT00000029474 // GO:0030433 // ER-associated ubiquitin-dependent protein catabolic process // inferred from electronic annotation /// ENSSSCT00000029474 // GO:…	ENSSSCT00000029474	5.3943	5.5134	5.69372	5.24481	5.55039	5.65412	5.53699	5.17496	5.32211	5.32742	5.58722	5.09598
15304578	chr6:-:48601948-48605047	FBXO2	FBXO2	0.312801	5.41852	4.37494	0.000402343	0.047587	0.21931	230	1.24212	NA	XM_013998979	PREDICTED: Sus scrofa F-box protein 2 (FBXO2), mRNA.	25	ENSSSCT00000029474 // GO:0006511 // ubiquitin-dependent protein catabolic process // inferred from electronic annotation /// ENSSSCT00000029474 // GO:0006516 // glycoprotein catabolic process // inferred from electronic annotation /// ENSSSCT00000029474 // GO:0030433 // ER-associated ubiquitin-dependent protein catabolic process // inferred from electronic annotation /// ENSSSCT00000029474 // GO:…	NA	5.3943	5.5134	5.69372	5.24481	5.55039	5.65412	5.53699	5.17496	5.32211	5.32742	5.58722	5.09598
15218310	---:---:-------	NA	NA	0.310871	8.73322	4.6947	0.000202345	0.0381933	0.850179	146	1.24046	NA	NA	NA	3	---	NA	8.8997	8.95785	8.75314	8.8914	9.05794	8.73078	8.30594	8.62831	8.70617	8.64215	8.9672	8.55159
15340951	g311275450:+:1-531	NA	LOC100518456	0.310634	4.9856	4.29591	0.000477374	0.0492946	0.0649094	262	1.24025	NA	XM_003134696	PREDICTED: Sus scrofa uncharacterized LOC100518456 (LOC100518456), mRNA.	25	---	NA	5.15982	5.39347	5.26192	4.94432	5.21668	5.20105	4.98104	4.79775	4.7962	5.34472	5.00465	4.94677
15191885	chr1:-:2649432-2919535	PRR18	PRR18	0.309995	6.7965	4.36164	0.000414073	0.0477449	0.190809	238	1.2397	proline rich 18	XM_003353160	PREDICTED: Sus scrofa proline rich 18 (PRR18), mRNA.	23	---	NA	6.78869	7.29245	7.24664	6.86306	6.97547	6.57536	6.61504	6.71848	6.86283	6.63428	6.76454	6.55953
15324204	---:---:-------	NA	NA	0.299533	12.0906	6.59218	4.30581e-06	0.00494414	4.38059	23	1.23075	NA	NA	NA	4	---	NA	12.2259	12.3297	12.1355	12.2853	12.293	12.2519	11.9045	11.9857	12.1599	12.0823	12.1071	12.0127
15346389	g335297835:+:1-794	GNGT2	GNGT2	0.298982	5.52893	4.47346	0.000325288	0.0446505	0.413596	199	1.23028	NA	XM_003358085	PREDICTED: Sus scrofa guanine nucleotide binding protein (G protein), gamma transducing activity polypeptide 2 (GNGT2), transcript variant X3, mRNA.	25	---	NA	5.36916	5.64826	5.91725	5.38438	5.85856	5.74047	5.47595	5.39241	5.4732	5.54455	5.49776	5.38012
15205448	chr11:-:53632422-53632814	RPS15A	RPS15A	0.296982	12.1511	5.38525	4.73861e-05	0.0189256	2.19404	69	1.22857	NA	XM_005658618	PREDICTED: Sus scrofa ribosomal protein S15a (RPS15A), mRNA.	14	---	NA	12.4731	12.4121	12.318	12.3787	12.3632	12.2842	11.9984	12.0624	12.27	12.1893	12.217	12.1384
15321601	chr8:+:101151372-101163641	LOC100739409	LOC100739409	0.295104	7.19108	4.27845	0.000495769	0.0500454	0.0168845	273	1.22697	uncharacterized LOC100739409	XR_298955	PREDICTED: Sus scrofa uncharacterized LOC100739409 (LOC100739409), ncRNA.	27	ENSSSCT00000010035 // GO:0008152 // metabolic process // inferred from electronic annotation /// ENSSSCT00000010035 // GO:0006635 // fatty acid beta-oxidation // inferred from electronic annotation /// ENSSSCT00000010035 // GO:0030855 // epithelial cell differentiation // inferred from electronic annotation /// ENSSSCT00000010035 // GO:0019290 // siderophore biosynthetic process // --- /// ENSSSC…	ENSSSCT00000010035	7.03506	7.28295	7.21342	7.18763	7.09847	7.31924	6.78823	7.19448	6.98407	7.05453	7.11817	6.93206
15341543	g335280803:+:1-1410	RNF183	RNF183	0.29312	3.92139	4.70462	0.000198103	0.0380828	0.86782	142	1.22529	NA	XM_013993765	PREDICTED: Sus scrofa ring finger protein 183 (RNF183), transcript variant X2, mRNA.	15	---	NA	3.90891	4.18225	3.96412	4.1313	4.19837	4.2271	4.00748	3.47784	3.95211	3.95292	3.90944	3.86158
15205051	chr11:-:16916570-16933421	DLEU7	DLEU7	0.293057	5.451	4.48324	0.000318502	0.0443296	0.433325	198	1.22523	deleted in lymphocytic leukemia, 7	XM_005668396	PREDICTED: Sus scrofa deleted in lymphocytic leukemia, 7 (DLEU7), mRNA.	27	---	ENSSSCT00000010285 ENSSSCT00000010286	5.44861	5.57304	5.7077	5.6314	5.63588	5.66844	5.31183	5.52231	5.49733	5.32847	5.64365	5.24466
15269389	chr3:+:34867636-34868997	TIGD7	TIGD7	0.286466	5.58273	4.42519	0.000360964	0.0455341	0.319774	216	1.21965	NA	XM_013995734	PREDICTED: Sus scrofa tigger transposable element derived 7 (TIGD7), mRNA.	23	---	NA	5.74398	5.40564	5.70157	5.47805	5.88408	5.73597	5.36985	5.37871	5.84322	5.39672	5.44649	5.52638
15347879	g335302409:+:1-2041	PWWP2B	LOC100154915	0.284921	6.52021	4.36473	0.00041132	0.0476422	0.200757	235	1.21834	NA	XM_013981891	PREDICTED: Sus scrofa PWWP domain-containing protein 2B (LOC100154915), transcript variant X1, mRNA.	10	---	NA	6.56248	6.83858	6.76395	6.76914	6.68909	6.67229	6.38347	6.39826	6.58867	6.27345	6.83194	6.52671
15220345	chr13:-:29446555-29454495	GNL3	GNL3	0.282561	7.40479	4.34028	0.000433647	0.0483824	0.146022	247	1.21635	guanine nucleotide binding protein-like 3 (nucleolar)	XM_001928454	PREDICTED: Sus scrofa guanine nucleotide binding protein-like 3 (nucleolar) (GNL3), transcript variant X3, mRNA.	28	XM_001928454 // GO:0042254 // ribosome biogenesis // --- /// XM_001928454 // GO:1902895 // positive regulation of pri-miRNA transcription from RNA polymerase II promoter // inferred from electronic annotation /// ENSSSCT00000012529 // GO:1902895 // positive regulation of pri-miRNA transcription from RNA polymerase II promoter // inferred from electronic annotation /// ENSSSCT00000012529 // GO:004…	ENSSSCT00000012529	7.68576	7.40669	7.39303	7.73155	7.43891	7.42082	7.16537	7.19806	7.50923	7.39643	7.20878	7.1566
15265850	chr2:-:75467243-75475222	OTP	OTP	0.278436	6.1889	4.62726	0.00023375	0.0389354	0.717537	162	1.21288	orthopedia homeobox	XM_003123718	PREDICTED: Sus scrofa orthopedia homeobox (OTP), transcript variant X1, mRNA.	20	XM_003123718 // GO:0002052 // positive regulation of neuroblast proliferation // inferred from electronic annotation /// XM_003123718 // GO:0006355 // regulation of transcription, DNA-templated // inferred from electronic annotation /// XM_003123718 // GO:0021879 // forebrain neuron differentiation // inferred from electronic annotation /// XM_003123718 // GO:0021979 // hypothalamus cell differen…	ENSSSCT00000015401	6.37737	6.37699	6.44842	6.19283	6.45313	6.49478	6.14782	6.32503	6.20646	6.32495	6.18874	5.90476
15213948	chr12:-:50067474-50067608	NA	NA	0.276276	13.002	4.41043	0.000372649	0.0463088	0.280604	221	1.21106	NA	NA	NA	24	---	NA	13.1523	12.9978	13.0287	13.2017	13.0345	13.1151	12.8798	12.7168	12.8986	12.8522	13.0262	13.0595
15269701	chr3:+:36129715-36299032	NA	NA	0.27173	7.79253	4.70706	0.00019707	0.0380828	0.871427	140	1.20725	NA	NA	NA	22	---	NA	7.99302	8.0136	8.11846	7.69577	8.10403	8.02984	7.7419	7.7849	7.75672	7.82796	7.86153	7.88062
15230035	chr14:-:26239884-26435132	TMEM132C	LOC100737673	0.267901	6.06239	4.2855	0.000488259	0.0499909	0.0324518	269	1.20405	transmembrane protein 132C-like	XM_003483410	PREDICTED: Sus scrofa transmembrane protein 132C-like (LOC100737673), partial mRNA.	23	---	ENSSSCT00000010692	5.96066	6.22978	6.36712	6.31074	6.36788	6.52516	6.04004	6.13235	6.14076	6.201	6.10606	6.01442
15350503	g335310334:+:1-676	SERHL2	SERHL2	0.264844	6.20763	4.38438	0.000394215	0.047587	0.240349	225	1.20151	NA	XM_013992187	PREDICTED: Sus scrofa serine hydrolase-like 2 (SERHL2), mRNA.	25	---	NA	6.30178	6.30077	6.2682	6.28415	6.43145	6.32071	6.0832	6.31337	6.35702	6.16177	5.9919	5.92212
15344609	g335291471:+:1-612	LDLRAD1	LDLRAD1	0.264613	5.80893	4.31091	0.000462114	0.0490807	0.0842226	259	1.20131	NA	XM_003356463	PREDICTED: Sus scrofa low density lipoprotein receptor class A domain containing 1 (LDLRAD1), mRNA.	25	---	NA	5.81421	5.98526	5.98425	6.16306	5.98747	6.06604	5.78608	5.59209	5.88063	5.82763	5.84689	5.82857
15286026	chr4:-:106090151-106092353	WARS2	WARS2	0.247948	6.52434	4.6348	0.000230008	0.0389354	0.731913	159	1.18752	tryptophanyl tRNA synthetase 2, mitochondrial	NM_001315752	Sus scrofa tryptophanyl tRNA synthetase 2, mitochondrial (WARS2), mRNA.	26	ENSSSCT00000027281 // GO:0006418 // tRNA aminoacylation for protein translation // inferred from electronic annotation /// ENSSSCT00000027281 // GO:0006436 // tryptophanyl-tRNA aminoacylation // inferred from electronic annotation	ENSSSCT00000027281	6.47039	6.69267	6.63313	6.7118	6.64357	6.47756	6.31042	6.58552	6.46641	6.5403	6.47885	6.39613
15233766	chr14:-:114405275-114429579	PYROXD2	PYROXD2	0.244004	5.98767	4.55025	0.000275749	0.0412174	0.564791	184	1.18427	pyridine nucleotide-disulphide oxidoreductase domain 2	XM_001926699	PREDICTED: Sus scrofa pyridine nucleotide-disulphide oxidoreductase domain 2 (PYROXD2), mRNA.	28	ENSSSCT00000011523 // GO:0055114 // oxidation-reduction process // inferred from electronic annotation /// ENSSSCT00000023165 // GO:0055114 // oxidation-reduction process // inferred from electronic annotation	ENSSSCT00000011523 ENSSSCT00000023165	6.13326	6.00048	6.36358	6.09235	6.13197	6.08876	5.82341	6.04322	6.03617	6.01296	5.97221	5.83434
15342501	g335284426:+:1-4314	ATXN2L	ATXN2L	-0.21514	7.75162	-4.40993	0.000373052	0.0463088	0.278904	222	-1.16082	NA	XM_003354564	PREDICTED: Sus scrofa ataxin 2-like (ATXN2L), transcript variant X6, mRNA.	30	---	NA	7.6313	7.519	7.41943	7.57811	7.61312	7.58872	7.82083	7.78346	7.68306	7.63615	7.66849	7.8103
15292609	chr5:-:20955320-21039714	BAZ2A	LOC100153516	-0.216834	7.78893	-4.34925	0.000425317	0.0481857	0.164845	243	-1.16218	bromodomain adjacent to zinc finger domain protein 2A	XM_001927752	PREDICTED: Sus scrofa bromodomain adjacent to zinc finger domain protein 2A (LOC100153516), transcript variant X2, mRNA.	24	ENSSSCT00000000436 // GO:0000183 // chromatin silencing at rDNA // inferred from electronic annotation /// ENSSSCT00000000436 // GO:0006338 // chromatin remodeling // inferred from electronic annotation /// ENSSSCT00000000436 // GO:0034770 // histone H4-K20 methylation // inferred from electronic annotation /// ENSSSCT00000000436 // GO:0051567 // histone H3-K9 methylation // inferred from electro…	ENSSSCT00000000436 ENSSSCT00000032195	7.68745	7.41933	7.73795	7.53868	7.66561	7.65431	7.80513	7.89089	7.72912	7.86071	7.68737	7.87235
15274358	chr3:-:30842719-31223905	RBFOX1	RBFOX1	-0.220398	8.37236	-4.3546	0.000420426	0.048075	0.170436	242	-1.16505	RNA binding protein, fox-1 homolog (C. elegans) 1	XM_013995662	PREDICTED: Sus scrofa RNA binding protein, fox-1 homolog (C. elegans) 1 (RBFOX1), transcript variant X1, mRNA.	21	ENSSSCT00000008677 // GO:0050885 // neuromuscular process controlling balance // inferred from electronic annotation /// ENSSSCT00000008677 // GO:0000381 // regulation of alternative mRNA splicing, via spliceosome // --- /// ENSSSCT00000008677 // GO:0007399 // nervous system development // ---	ENSSSCT00000008677	8.20023	8.13234	8.11204	8.08175	8.40006	8.29781	8.33143	8.40384	8.27219	8.31629	8.34572	8.43633
15226204	---:---:-------	NA	NA	-0.222	8.8864	-4.56949	0.000264583	0.0409628	0.599409	178	-1.16635	NA	NA	NA	4	---	NA	8.61369	8.72725	8.75698	8.69617	9.0426	8.77938	8.94194	8.82967	9.00083	8.84179	8.8888	8.98194
15308653	chr7:+:27869040-27879647	SKIV2L	SKIV2L	-0.222496	6.91427	-4.69927	0.000200377	0.0380828	0.856932	145	-1.16675	SKI2 homolog, superkiller viralicidic activity 2-like	NM_001101817	Sus scrofa SKI2 homolog, superkiller viralicidic activity 2-like (SKIV2L), mRNA.	25	NM_001101817 // GO:0006401 // RNA catabolic process // inferred from electronic annotation /// ENSSSCT00000001566 // GO:0008152 // metabolic process // inferred from electronic annotation /// ENSSSCT00000001566 // GO:0006401 // RNA catabolic process // inferred from electronic annotation /// ENSSSCT00000032754 // GO:0006401 // RNA catabolic process // inferred from electronic annotation /// ENSSS…	ENSSSCT00000001566 ENSSSCT00000032754 ENSSSCT00000035658 ENSSSCT00000036050	6.82056	6.76595	6.76867	6.77933	6.8464	6.73965	7.09474	7.01111	6.81182	6.88002	6.99282	6.93246
15277510	chr4:+:449645-462836	CYHR1	CYHR1	-0.226172	7.53289	-4.93907	0.000120372	0.0296181	1.30962	112	-1.16973	cysteine/histidine-rich 1	XM_001927620	PREDICTED: Sus scrofa cysteine/histidine-rich 1 (CYHR1), transcript variant X2, mRNA.	20	---	ENSSSCT00000029061	7.46771	7.161	7.1066	7.32695	7.70589	7.33434	7.53772	7.56956	7.45203	7.45767	7.54076	7.55151
15343383	g335288155:+:1-2785	LRP1	LOC102161422	-0.226641	8.86386	-4.65134	0.000222002	0.0389354	0.763403	154	-1.17011	NA	XM_013997652	PREDICTED: Sus scrofa prolow-density lipoprotein receptor-related protein 1-like (LOC102161422), mRNA.	25	---	NA	8.81121	8.74449	8.76013	8.83282	8.68972	8.7976	8.70783	9.06446	8.84777	8.93001	8.81588	9.03307
15293912	chr5:-:60007931-60014112	COPS7A	COPS7A	-0.234816	9.21922	-5.6448	2.78459e-05	0.0144357	2.67821	53	-1.17676	COP9 signalosome subunit 7A	XM_001925621	PREDICTED: Sus scrofa COP9 signalosome subunit 7A (COPS7A), transcript variant X1, mRNA.	27	XM_001925621 // GO:0010388 // cullin deneddylation // --- /// XM_003126528 // GO:0010388 // cullin deneddylation // --- /// XM_003355598 // GO:0010388 // cullin deneddylation // --- /// XM_005652598 // GO:0010388 // cullin deneddylation // --- /// ENSSSCT00000000753 // GO:0010388 // cullin deneddylation // --- /// ENSSSCT00000027368 // GO:0010388 // cullin deneddylation // ---	ENSSSCT00000000753 ENSSSCT00000027368	8.98117	9.04104	9.18278	9.01263	9.01678	9.08344	9.33992	9.26777	9.15665	9.14485	9.18308	9.22111
15339211	g166796034:+:1-1819	SIRT2	SIRT2	-0.236783	9.28146	-4.46269	0.000332925	0.0446505	0.392178	200	-1.17836	NA	NM_001114271	Sus scrofa sirtuin 2 (SIRT2), mRNA.	24	---	NA	8.93587	9.01266	9.0283	8.92384	9.15076	9.20701	9.13118	9.56152	9.11825	9.20262	9.16922	9.25753
15340669	g311269043:+:1-848	NA	NA	-0.241674	7.46994	-4.36715	0.000409168	0.0476422	0.199423	236	-1.18236	NA	NA	NA	25	---	NA	7.13493	7.44031	7.24063	7.28633	7.34494	7.4711	7.72586	7.56276	7.44201	7.50153	7.4261	7.50143
15299073	chr6:+:55481153-55485492	ZBTB40	ZBTB40	-0.244327	7.16325	-4.33102	0.000442426	0.0484992	0.122367	251	-1.18454	zinc finger and BTB domain containing 40	XM_005656045	PREDICTED: Sus scrofa zinc finger and BTB domain containing 40 (ZBTB40), transcript variant X1, mRNA.	24	---	ENSSSCT00000003913	6.9304	6.99789	6.89292	7.20471	7.04606	7.02885	7.22224	7.33869	7.02509	7.20808	7.08572	7.22865
15264415	chr2:-:55975158-55978161	C2H19orf43	C2H19orf43	-0.248459	8.78089	-4.30136	0.00047177	0.0492946	0.0631005	264	-1.18794	chromosome 2 open reading frame, human C19orf43	XM_003123323	PREDICTED: Sus scrofa chromosome 2 open reading frame, human C19orf43 (C2H19orf43), mRNA.	27	---	ENSSSCT00000015001	8.58682	8.64047	8.59683	8.39585	8.76172	8.77302	8.9123	8.82971	8.81121	8.83145	8.65945	8.92632
15295469	chr5:-:100004911-100009405	ALG12	ALG12	-0.248899	5.98671	-4.8821	0.000135799	0.0317147	1.21585	118	-1.1883	ALG12, alpha-1,6-mannosyltransferase	XM_013994084	PREDICTED: Sus scrofa ALG12, alpha-1,6-mannosyltransferase (ALG12), partial mRNA.	25	ENSSSCT00000001070 // GO:0006487 // protein N-linked glycosylation // inferred from electronic annotation /// ENSSSCT00000001070 // GO:0006488 // dolichol-linked oligosaccharide biosynthetic process // inferred from electronic annotation /// ENSSSCT00000001070 // GO:0006487 // protein N-linked glycosylation // --- /// ENSSSCT00000001070 // GO:0097502 // mannosylation // ---	ENSSSCT00000001070	5.90252	5.79394	5.90318	5.79113	6.13578	5.87841	6.13717	5.98265	5.99512	6.02782	6.01683	6.18146
15245189	chr16:-:65752255-65773579	LARP1	LARP1	-0.25737	9.84279	-4.88881	0.00013388	0.0315338	1.22015	117	-1.1953	La ribonucleoprotein domain family, member 1	XM_005674548	PREDICTED: Sus scrofa La ribonucleoprotein domain family, member 1 (LARP1), mRNA.	34	---	ENSSSCT00000018585	9.64632	9.69678	9.64049	9.60798	9.84281	9.65782	9.99816	9.75238	9.83978	9.91908	9.80776	9.83513
15351297	g51036688:+:1-867	NAA80/NAT6	NAT6	-0.258441	7.26728	-4.97653	0.000111219	0.0291901	1.4004	105	-1.19619	NA	NM_001003663	Sus scrofa N-acetyltransferase 6 (GCN5-related) (NAT6), mRNA.	25	---	NA	7.02519	7.06026	7.1019	6.72389	7.11005	7.09998	7.53483	7.29413	7.15651	7.28086	7.11154	7.31584
15342497	g335284422:+:1-4260	ATXN2L	ATXN2L	-0.259582	7.88145	-5.00649	0.000104411	0.0284888	1.46143	101	-1.19713	NA	XM_003124511	PREDICTED: Sus scrofa ataxin 2-like (ATXN2L), transcript variant X5, mRNA.	25	---	NA	7.65577	7.57789	7.43204	7.63309	7.63524	7.61824	7.90229	7.85714	7.76145	7.6833	7.69725	7.89229
15344001	g335289977:+:1-4731	GLTSCR1	GLTSCR1	-0.260906	6.46419	-4.81641	0.000156115	0.0340386	1.08909	126	-1.19823	NA	XM_003355987	PREDICTED: Sus scrofa glioma tumor suppressor candidate region gene 1 (GLTSCR1), transcript variant X1, mRNA.	25	---	NA	6.08224	6.31176	6.30004	6.3461	6.23842	6.25822	6.68692	6.4937	6.45004	6.41619	6.37985	6.49721
15348933	g335306579:+:1-3204	ARHGEF6	ARHGEF6	-0.262396	9.2578	-4.73726	0.00018477	0.037167	0.933638	136	-1.19947	NA	XM_005657927	PREDICTED: Sus scrofa Rac/Cdc42 guanine nucleotide exchange factor (GEF) 6 (ARHGEF6), transcript variant X6, mRNA.	25	---	NA	9.16115	9.04511	8.96882	9.09785	9.16279	9.24248	9.33578	9.46929	9.20887	9.43501	9.17903	9.11912
15289991	chr5:+:65886200-65936145	TUBA8	TUBA8	-0.263924	9.31358	-4.36635	0.00040988	0.0476422	0.191863	237	-1.20074	tubulin, alpha 8	XM_003126597	PREDICTED: Sus scrofa tubulin, alpha 8 (TUBA8), mRNA.	16	XM_003126597 // GO:0007017 // microtubule-based process // inferred from electronic annotation /// XM_003126597 // GO:0008152 // metabolic process // inferred from electronic annotation /// ENSSSCT00000000837 // GO:0007017 // microtubule-based process // inferred from electronic annotation /// ENSSSCT00000000837 // GO:0006184 // obsolete GTP catabolic process // inferred from electronic annotatio…	ENSSSCT00000000837 ENSSSCT00000024939	9.09479	9.21208	9.13294	8.73515	9.23771	9.1175	9.4608	9.38891	9.16627	9.29261	9.31217	9.34515
15231293	chr14:-:48124657-48144514	SF3A1	SF3A1	-0.265614	8.48448	-5.2409	6.39121e-05	0.022122	1.9073	79	-1.20215	splicing factor 3a, subunit 1, 120kDa	XM_003483452	PREDICTED: Sus scrofa splicing factor 3a, subunit 1, 120kDa (SF3A1), mRNA.	27	XM_003483452 // GO:0000389 // mRNA 3'-splice site recognition // --- /// XM_003483452 // GO:0006396 // RNA processing // inferred from electronic annotation /// ENSSSCT00000010959 // GO:0006396 // RNA processing // inferred from electronic annotation /// ENSSSCT00000010959 // GO:0000389 // mRNA 3'-splice site recognition // --- /// ENSSSCT00000031961 // GO:0006396 // RNA processing // inferred fr…	ENSSSCT00000010959 ENSSSCT00000031961	8.29234	8.32423	8.23492	8.22381	8.30991	8.24412	8.43325	8.53829	8.36262	8.52256	8.43469	8.53606
15310651	chr7:+:59041792-59058903	MAN2A2	MAN2A2	-0.266351	8.70293	-4.30041	0.000472743	0.0492946	0.0571104	266	-1.20276	mannosidase, alpha, class 2A, member 2	XM_001929378	PREDICTED: Sus scrofa mannosidase, alpha, class 2A, member 2 (MAN2A2), transcript variant X7, mRNA.	39	ENSSSCT00000002038 // GO:0005975 // carbohydrate metabolic process // inferred from electronic annotation /// ENSSSCT00000002038 // GO:0006013 // mannose metabolic process // inferred from electronic annotation /// ENSSSCT00000002038 // GO:0006013 // mannose metabolic process // --- /// ENSSSCT00000002038 // GO:0006491 // N-glycan processing // --- /// ENSSSCT00000002038 // GO:0006517 // protein …	ENSSSCT00000002038	8.41066	8.59953	8.45226	8.38294	8.67158	8.4374	8.68725	8.79361	8.53369	8.70645	8.66558	8.71961
15280608	chr4:+:99978615-99990851	DENND4B	DENND4B	-0.268555	7.44957	-4.70096	0.000199655	0.0380828	0.859718	144	-1.2046	DENN/MADD domain containing 4B	XM_003481445	PREDICTED: Sus scrofa DENN/MADD domain containing 4B (DENND4B), transcript variant X2, mRNA.	24	ENSSSCT00000007196 // GO:0032483 // regulation of Rab protein signal transduction // inferred from electronic annotation /// ENSSSCT00000007196 // GO:0043547 // positive regulation of GTPase activity // inferred from electronic annotation	ENSSSCT00000007196	7.2191	7.22	7.17448	7.18219	7.27114	7.15964	7.48715	7.4588	7.3486	7.39923	7.44333	7.2094
15225611	chr14:+:51625285-51651739	CRKL	CRKL	-0.269094	9.11274	-4.35477	0.000420276	0.048075	0.181045	240	-1.20505	v-crk avian sarcoma virus CT10 oncogene homolog-like	XM_003132994	PREDICTED: Sus scrofa v-crk avian sarcoma virus CT10 oncogene homolog-like (CRKL), mRNA.	21	XM_003132994 // GO:0001568 // blood vessel development // inferred from electronic annotation /// XM_003132994 // GO:0007389 // pattern specification process // inferred from electronic annotation /// XM_003132994 // GO:0007507 // heart development // inferred from electronic annotation /// XM_003132994 // GO:0008284 // positive regulation of cell proliferation // inferred from electronic annotat…	ENSSSCT00000011056	8.97647	8.96592	8.85995	8.7918	8.92074	9.00451	9.24448	9.14435	9.0764	9.22575	9.1063	9.06384
15291779	chr5:-:13744512-13758153	LMBR1L	LMBR1L	-0.269892	6.56005	-4.57943	0.000258998	0.0404308	0.621947	176	-1.20572	limb development membrane protein 1-like	XM_013988249	PREDICTED: Sus scrofa limb development membrane protein 1-like (LMBR1L), mRNA.	28	---	ENSSSCT00000000200	6.42953	6.58245	6.19101	6.46137	6.51531	6.46746	6.51498	6.81996	6.52731	6.54563	6.61701	6.7883
15343357	g335288062:+:1-552	CS	CS	-0.271338	10.5235	-4.86399	0.000141114	0.0324069	1.17742	120	-1.20693	NA	NM_214276	Sus scrofa citrate synthase (CS), mRNA.	25	---	NA	10.251	10.2822	10.289	10.3398	10.3677	10.4654	10.6402	10.7356	10.4418	10.3552	10.4452	10.5502
15336158	chrX:-:28112972-28113139	NA	NA	-0.272476	7.0388	-4.62378	0.0002355	0.0389354	0.710835	163	-1.20788	NA	NA	NA	24	---	NA	6.8603	7.08339	6.89331	6.79593	6.90034	6.87086	6.89647	7.22228	6.79896	7.15729	7.05919	7.16928
15189754	chr1:+:250903125-250942710	TMOD1	TMOD1	-0.273271	10.29	-4.66802	0.000214218	0.0389354	0.797068	150	-1.20854	NA	XM_003353588	PREDICTED: Sus scrofa tropomodulin 1 (TMOD1), mRNA.	20	---	NA	10.1636	10.1502	10.0844	10.3902	10.2245	10.1113	10.429	10.3218	10.5224	10.2433	10.257	10.5189
15231780	chr14:-:51806120-51858409	MED15	MED15	-0.278762	7.76207	-4.27518	0.000499302	0.0502181	0.00841872	275	-1.21315	mediator complex subunit 15	XM_013981468	PREDICTED: Sus scrofa mediator complex subunit 15 (MED15), mRNA.	27	ENSSSCT00000011068 // GO:0006366 // transcription from RNA polymerase II promoter // inferred from electronic annotation /// ENSSSCT00000011068 // GO:0006357 // regulation of transcription from RNA polymerase II promoter // inferred from electronic annotation /// ENSSSCT00000011068 // GO:0019827 // stem cell population maintenance // inferred from electronic annotation /// ENSSSCT00000028715 // G…	ENSSSCT00000011068 ENSSSCT00000028715	7.50196	7.62515	7.38026	7.58452	7.66042	7.5671	7.81764	7.99473	7.6602	7.73757	7.63455	7.80745
15270188	---:---:-------	NA	NA	-0.280268	8.3881	-5.26396	6.09189e-05	0.0215231	1.95131	78	-1.21442	NA	NA	NA	3	---	NA	8.21732	8.1643	7.84891	8.03126	8.37244	8.12166	8.20262	8.45162	8.26518	8.29638	8.33662	8.43978
15209487	chr12:+:49158464-49161394	PFN1	PFN1	-0.281865	10.5255	-4.38867	0.000390577	0.047587	0.236237	227	-1.21577	profilin 1	NM_001244416	Sus scrofa profilin 1 (PFN1), mRNA.	25	NM_001244416 // GO:0030036 // actin cytoskeleton organization // inferred from electronic annotation /// NM_001244416 // GO:0001843 // neural tube closure // inferred from electronic annotation /// NM_001244416 // GO:0006357 // regulation of transcription from RNA polymerase II promoter // inferred from electronic annotation /// NM_001244416 // GO:0010634 // positive regulation of epithelial cell…	ENSSSCT00000019485	10.4956	10.2288	10.302	10.1957	10.2761	10.3284	10.6116	10.5303	10.3269	10.4243	10.4391	10.7145
15261211	chr2:-:5397982-5423806	CAPN1	CAPN1	-0.282339	8.31793	-4.84662	0.00014641	0.0325384	1.1482	124	-1.21616	calpain 1, (mu/I) large subunit	NM_213972	Sus scrofa calpain 1, (mu/I) large subunit (CAPN1), mRNA.	32	NM_213972 // GO:0006508 // proteolysis // not recorded /// NM_213972 // GO:0006508 // proteolysis // inferred from sequence or structural similarity /// NM_213972 // GO:0032801 // receptor catabolic process // inferred from electronic annotation /// NM_213972 // GO:0060056 // mammary gland involution // inferred from electronic annotation /// NM_213972 // GO:0006508 // proteolysis // --- /// NM_2…	ENSSSCT00000014210	8.25382	8.13588	7.96354	8.02735	8.27178	8.19598	8.43794	8.40093	8.24755	8.35451	8.24575	8.50428
15347557	g335300852:+:1-2549	SLC19A1	SLC19A1	-0.282656	6.67592	-4.94911	0.000117847	0.0293429	1.34934	110	-1.21643	NA	XM_005657183	PREDICTED: Sus scrofa solute carrier family 19 (folate transporter), member 1 (SLC19A1), transcript variant X1, mRNA.	25	---	NA	6.64919	6.5954	6.54084	6.522	6.44752	6.54794	6.78773	6.93482	6.73359	6.67461	6.7293	6.73395
15208510	chr12:+:35488384-35538446	LOC106504100	LOC106504100	-0.285195	8.07651	-4.4526	0.00034024	0.0446505	0.372675	207	-1.21857	protein phosphatase 1D-like	XM_005669011	PREDICTED: Sus scrofa protein phosphatase 1D-like (LOC106504100), mRNA.	28	XM_005669011 // GO:0006470 // protein dephosphorylation // inferred from electronic annotation /// XM_005669011 // GO:0035970 // peptidyl-threonine dephosphorylation // inferred from electronic annotation /// ENSSSCT00000029828 // GO:0006470 // protein dephosphorylation // inferred from electronic annotation /// ENSSSCT00000029828 // GO:0035970 // peptidyl-threonine dephosphorylation // inferred …	ENSSSCT00000029828 ENSSSCT00000025171	7.90498	7.92702	7.9747	7.9726	7.79581	7.86466	8.20213	7.88573	8.02488	8.2354	7.86759	8.31068
15332180	chr9:-:109107409-109139928	RC3H1	RC3H1	-0.288833	9.33081	-4.42469	0.000361353	0.0455341	0.313995	218	-1.22165	NA	XM_003357546	PREDICTED: Sus scrofa ring finger and CCCH-type domains 1 (RC3H1), transcript variant X1, mRNA.	32	---	NA	8.99223	9.04748	9.09187	9.2911	9.00042	9.13669	9.38794	9.30556	9.27678	9.28295	9.32556	9.28635
15212995	chr12:-:42860412-42903417	PHF12	PHF12	-0.289664	7.49518	-4.32817	0.000445162	0.0484992	0.111881	254	-1.22236	PHD finger protein 12	XM_005656997	PREDICTED: Sus scrofa PHD finger protein 12 (PHF12), transcript variant X1, mRNA.	27	XM_005656997 // GO:0000122 // negative regulation of transcription from RNA polymerase II promoter // --- /// XM_005656997 // GO:0000122 // negative regulation of transcription from RNA polymerase II promoter // inferred from electronic annotation /// XM_005656997 // GO:0045892 // negative regulation of transcription, DNA-templated // inferred from electronic annotation /// ENSSSCT00000019351 // …	ENSSSCT00000019351	7.24294	7.26649	7.14094	7.06804	7.24894	7.13019	7.52646	7.45876	7.29649	7.43454	7.27095	7.47934
15236102	chr15:+:55597935-55657213	SAP130	SAP130	-0.291877	8.87566	-4.31345	0.000459576	0.0490807	0.0879667	256	-1.22423	NA	XM_005671830	PREDICTED: Sus scrofa Sin3A-associated protein, 130kDa (SAP130), mRNA.	26	---	NA	8.53411	8.77074	8.70873	8.25497	8.87124	8.73986	8.9828	9.01834	8.79637	8.88522	8.83978	8.87522
15304754	chr6:-:51505946-51522784	PLEKHM2	PLEKHM2	-0.291949	9.72315	-4.30996	0.000463059	0.0490807	0.0873967	257	-1.22429	pleckstrin homology domain containing, family M (with RUN domain) member 2	XM_013988768	PREDICTED: Sus scrofa pleckstrin homology domain containing, family M (with RUN domain) member 2 (PLEKHM2), mRNA.	37	ENSSSCT00000003854 // GO:0007030 // Golgi organization // inferred from electronic annotation /// ENSSSCT00000003854 // GO:0032880 // regulation of protein localization // inferred from electronic annotation	ENSSSCT00000003854 ENSSSCT00000026419	9.51111	9.52383	9.32129	9.45521	9.66013	9.46779	9.81339	9.79508	9.72229	9.84701	9.45902	9.58683
15331107	chr9:-:60513800-60515263	ASB7	ASB7	-0.292367	8.0511	-5.79057	2.07341e-05	0.011661	2.93948	48	-1.22465	NA	XM_003121646	PREDICTED: Sus scrofa ankyrin repeat and SOCS box containing 7 (ASB7), transcript variant X1, mRNA.	25	---	NA	7.86651	7.76157	7.89849	7.89784	7.91019	7.92212	8.15495	8.13032	7.98776	7.94904	8.15636	8.21327
15207151	chr12:+:17248235-17260637	DUSP3	DUSP3	-0.295916	9.12234	-4.61241	0.000241308	0.0389354	0.686694	170	-1.22766	dual specificity phosphatase 3	XM_003131360	PREDICTED: Sus scrofa dual specificity phosphatase 3 (DUSP3), mRNA.	22	XM_003131360 // GO:0000188 // inactivation of MAPK activity // inferred from electronic annotation /// XM_003131360 // GO:0006470 // protein dephosphorylation // --- /// XM_003131360 // GO:0006470 // protein dephosphorylation // inferred from electronic annotation /// XM_003131360 // GO:0016311 // dephosphorylation // inferred from electronic annotation /// XM_003131360 // GO:0035335 // peptidyl-…	ENSSSCT00000024088	8.91731	8.81016	8.67667	8.88092	8.92545	8.89613	9.16132	9.45824	8.91701	9.06548	9.12984	9.02338
15247223	chr17:+:48618603-48622167	LOC102159228	LOC102159228	-0.297427	8.53814	-4.45806	0.000336263	0.0446505	0.37376	206	-1.22895	uncharacterized LOC102159228	XR_001302154	PREDICTED: Sus scrofa uncharacterized LOC102159228 (LOC102159228), transcript variant X2, ncRNA.	21	---	NA	8.38945	8.33774	8.24033	8.4252	8.43739	8.26201	8.75619	8.60084	8.55021	8.5262	8.39623	8.61794
15303201	chr6:-:35795909-35798721	BCL3	BCL3	-0.303001	6.86876	-4.70466	0.000198086	0.0380828	0.86595	143	-1.23371	B-cell CLL/lymphoma 3	NM_001315716	Sus scrofa B-cell CLL/lymphoma 3 (BCL3), mRNA.	24	---	ENSSSCT00000035316 ENSSSCT00000036014	6.73141	6.96996	6.50517	6.06934	6.53476	6.44738	6.79339	6.80661	6.85884	6.52461	6.82553	7.29879
15297343	chr6:+:36334833-36360565	STRN4	STRN4	-0.304192	8.68219	-5.10876	8.42215e-05	0.025228	1.65205	92	-1.23473	striatin, calmodulin binding protein 4	XM_003127236	PREDICTED: Sus scrofa striatin, calmodulin binding protein 4 (STRN4), mRNA.	24	---	ENSSSCT00000003443	8.43576	8.46437	8.31709	8.3911	8.706	8.48416	8.76517	8.75541	8.61545	8.8626	8.50742	8.44619
15300768	chr6:+:113635952-113649304	CC2D1B	LOC100622838	-0.304482	6.50608	-4.44885	0.000343002	0.0446505	0.365357	210	-1.23498	coiled-coil and C2 domain-containing protein 1B-like	XM_003482080	PREDICTED: Sus scrofa coiled-coil and C2 domain-containing protein 1B-like (LOC100622838), transcript variant X1, mRNA.	18	XM_003482080 // GO:0000122 // negative regulation of transcription from RNA polymerase II promoter // --- /// XM_005665427 // GO:0000122 // negative regulation of transcription from RNA polymerase II promoter // --- /// XM_005665430 // GO:0000122 // negative regulation of transcription from RNA polymerase II promoter // --- /// ENSSSCT00000004274 // GO:0000122 // negative regulation of transcript…	ENSSSCT00000004274 ENSSSCT00000030455 ENSSSCT00000023805 ENSSSCT00000028298	6.39083	6.4903	6.07174	6.21183	6.54168	6.3553	6.4765	6.8336	6.43162	6.44848	6.67782	6.68322
15228232	chr14:+:118662408-118675520	TRIM8	TRIM8	-0.307376	7.21118	-4.44384	0.000346731	0.0446505	0.350476	213	-1.23746	tripartite motif containing 8	XM_001928904	PREDICTED: Sus scrofa tripartite motif containing 8 (TRIM8), mRNA.	24	XM_001928904 // GO:0019827 // stem cell population maintenance // inferred from electronic annotation /// XM_001928904 // GO:0032897 // negative regulation of viral transcription // inferred from electronic annotation /// XM_001928904 // GO:0043123 // positive regulation of I-kappaB kinase/NF-kappaB signaling // inferred from electronic annotation /// XM_001928904 // GO:0045087 // innate immune r…	ENSSSCT00000011580	7.13872	7.00131	6.69394	6.89326	7.01406	6.88944	7.2746	7.26438	6.98645	7.25451	7.05221	7.27783
15347671	g335301298:+:1-802	RNF10	LOC106504151	-0.307956	9.10782	-4.62256	0.000236115	0.0389354	0.702411	165	-1.23795	NA	XM_005670712	PREDICTED: Sus scrofa RING finger protein 10-like (LOC106504151), mRNA.	25	---	NA	8.93728	8.96438	8.79308	8.80075	8.95385	8.96213	9.27834	9.1316	9.02474	9.12856	9.10794	9.13667
15316764	chr7:-:59213778-59236583	SLC41A3	SLC41A3	-0.310369	7.88318	-4.28037	0.000493718	0.0500216	0.0210259	271	-1.24002	solute carrier family 41, member 3	XM_005653514	PREDICTED: Sus scrofa solute carrier family 41, member 3 (SLC41A3), mRNA.	31	ENSSSCT00000002044 // GO:0006812 // cation transport // inferred from electronic annotation /// ENSSSCT00000002044 // GO:0098655 // cation transmembrane transport // inferred from electronic annotation /// ENSSSCT00000002044 // GO:0055085 // transmembrane transport // ---	ENSSSCT00000002044	7.52603	7.59726	7.59228	8.11215	7.76966	7.4363	7.99884	8.03762	7.77585	7.84606	7.75361	7.86171
15313800	chr7:+:136216218-136225447	NA	NA	-0.310409	10.2801	-4.57821	0.00025968	0.0404308	0.618875	177	-1.24006	NA	NA	NA	25	---	NA	10.0909	10.0879	9.85494	10.0898	10.2697	10.1749	10.4314	10.4646	10.3213	10.3372	10.1939	10.1154
15267769	---:---:-------	NA	NA	-0.312334	11.5402	-5.3021	5.62821e-05	0.0205398	1.98326	77	-1.24171	NA	NA	NA	3	---	NA	11.5806	11.0962	11.1184	10.9167	11.1067	11.2245	11.5869	11.3993	10.8992	11.2748	11.8179	11.4293
15342365	g335284017:+:1-1309	EIF2AK1	EIF2AK1	-0.312612	8.62522	-4.46078	0.000334294	0.0446505	0.389865	201	-1.24195	NA	XM_003124284	PREDICTED: Sus scrofa eukaryotic translation initiation factor 2-alpha kinase 1 (EIF2AK1), mRNA.	17	---	NA	8.49868	8.32083	8.56938	8.66855	8.574	8.42821	8.78565	8.81859	8.78987	8.93862	8.52873	8.77373
15303640	chr6:-:38543474-38579195	AP2A1	AP2A1	-0.313416	6.50816	-4.62396	0.000235411	0.0389354	0.70794	164	-1.24265	adaptor-related protein complex 2, alpha 1 subunit	XM_003127338	PREDICTED: Sus scrofa adaptor-related protein complex 2, alpha 1 subunit (AP2A1), transcript variant X3, mRNA.	28	XM_003127338 // GO:0006810 // transport // inferred from electronic annotation /// XM_003127338 // GO:0006886 // intracellular protein transport // inferred from electronic annotation /// XM_003127338 // GO:0015031 // protein transport // inferred from electronic annotation /// XM_003127338 // GO:0016192 // vesicle-mediated transport // inferred from electronic annotation /// XM_003127338 // GO:1…	ENSSSCT00000003554 ENSSSCT00000026861	6.26782	6.13934	6.14621	6.24069	6.6168	6.4282	6.63263	6.64917	6.42472	6.38804	6.42247	6.53437
15231565	chr14:-:50734373-50791247	CABIN1	CABIN1	-0.31504	7.36896	-4.29569	0.000477598	0.0492946	0.0504831	267	-1.24405	NA	XM_013983133	PREDICTED: Sus scrofa calcineurin binding protein 1 (CABIN1), transcript variant X1, mRNA.	21	---	NA	6.99418	7.15711	7.20929	7.25953	7.21968	7.29876	7.61031	7.48635	7.4457	7.34522	7.339	7.30079
15337204	chrX:-:56862227-56867783	FOXO4	FOXO4	-0.322172	7.0289	-4.44582	0.000345256	0.0446505	0.359542	211	-1.25021	forkhead box O4	XM_003135172	PREDICTED: Sus scrofa forkhead box O4 (FOXO4), mRNA.	22	XM_003135172 // GO:0006355 // regulation of transcription, DNA-templated // inferred from electronic annotation /// XM_003135172 // GO:0007050 // cell cycle arrest // inferred from electronic annotation /// XM_003135172 // GO:0007095 // mitotic G2 DNA damage checkpoint // inferred from electronic annotation /// XM_003135172 // GO:0008285 // negative regulation of cell proliferation // inferred fr…	ENSSSCT00000013557 ENSSSCT00000032851 ENSSSCT00000036657	6.75789	6.91949	6.70057	6.92944	7.12203	6.91204	7.18018	7.2528	7.02628	7.31724	6.8277	7.18837
15350655	g335310561:+:1-254	NA	LOC100624156	-0.322227	7.36027	-5.04092	9.71136e-05	0.0273087	1.5222	97	-1.25026	NA	XR_300518	PREDICTED: Sus scrofa uncharacterized LOC100624156 (LOC100624156), ncRNA.	26	---	NA	7.18457	7.08221	6.88985	7.06321	7.13336	7.36261	7.44531	7.42765	6.90818	7.42657	7.43191	7.44795
15242008	chr15:-:130898947-130904815	GTPBP2	LOC100737129	-0.32498	6.95748	-4.76548	0.000173982	0.037167	0.988428	129	-1.25265	GTP-binding protein 2-like	XM_005666052	PREDICTED: Sus scrofa GTP-binding protein 2-like (LOC100737129), mRNA.	33	ENSSSCT00000001886 // GO:0006184 // obsolete GTP catabolic process // inferred from electronic annotation /// ENSSSCT00000001886 // GO:0008152 // metabolic process // inferred from electronic annotation /// ENSSSCT00000017803 // GO:0006184 // obsolete GTP catabolic process // inferred from electronic annotation /// ENSSSCT00000017803 // GO:0008152 // metabolic process // inferred from electronic …	ENSSSCT00000001886 ENSSSCT00000017803	6.91114	6.73808	6.56684	6.69322	7.06578	6.69728	6.75744	7.28983	6.87591	6.95907	7.00305	7.01572
15326616	chr9:+:51701577-51707709	FOXO4	SRPR	-0.326981	9.93743	-4.85385	0.000144181	0.0325384	1.16238	121	-1.25439	signal recognition particle receptor (docking protein)	XM_003130057	PREDICTED: Sus scrofa signal recognition particle receptor (docking protein) (SRPR), mRNA.	22	ENSSSCT00000016593 // GO:0006184 // obsolete GTP catabolic process // inferred from electronic annotation /// ENSSSCT00000016593 // GO:0006614 // SRP-dependent cotranslational protein targeting to membrane // inferred from electronic annotation /// ENSSSCT00000016593 // GO:0006810 // transport // inferred from electronic annotation /// ENSSSCT00000016593 // GO:0006886 // intracellular protein tra…	ENSSSCT00000016593	9.64461	9.91106	9.6695	9.63972	10.039	9.67638	10.0409	9.98809	9.8433	10.1512	9.84023	10.0462
15297718	chr6:+:38477164-38484612	AKT1S1	AKT1S1	-0.327527	8.67776	-4.37569	0.000401687	0.047587	0.211599	233	-1.25486	AKT1 substrate 1 (proline-rich)	XM_003127335	PREDICTED: Sus scrofa AKT1 substrate 1 (proline-rich) (AKT1S1), transcript variant X1, mRNA.	23	XM_005664751 // GO:0006469 // negative regulation of protein kinase activity // inferred from electronic annotation /// XM_005664751 // GO:0032007 // negative regulation of TOR signaling // inferred from electronic annotation /// XM_005664751 // GO:0045792 // negative regulation of cell size // inferred from electronic annotation /// XM_005664751 // GO:0048011 // neurotrophin TRK receptor signali…	ENSSSCT00000003549	8.54494	8.56376	8.28566	7.97484	8.48876	8.47031	8.80152	8.77333	8.61703	8.56662	8.66302	8.66461
15285018	chr4:-:97229068-97230247	MEF2D	MEF2D	-0.328185	11.5438	-4.49453	0.000310858	0.0438556	0.45419	195	-1.25543	NA	XM_003125698	PREDICTED: Sus scrofa myocyte enhancer factor 2D (MEF2D), transcript variant X1, mRNA.	24	---	NA	11.3659	11.492	11.4216	10.8919	11.4417	11.3114	11.7402	11.6991	11.5088	11.7545	11.3878	11.4972
15279273	chr4:+:81062167-81093696	PCMTD1	PCMTD1	-0.332771	10.6938	-4.28933	0.000484222	0.0497918	0.0411198	268	-1.25943	protein-L-isoaspartate (D-aspartate) O-methyltransferase domain containing 1	XM_005655366	PREDICTED: Sus scrofa protein-L-isoaspartate (D-aspartate) O-methyltransferase domain containing 1 (PCMTD1), transcript variant X2, mRNA.	28	ENSSSCT00000006866 // GO:0006464 // cellular protein modification process // inferred from electronic annotation /// ENSSSCT00000006866 // GO:0006479 // protein methylation // inferred from electronic annotation /// ENSSSCT00000006866 // GO:0032259 // methylation // inferred from electronic annotation	ENSSSCT00000006866	10.6224	10.6303	10.6488	10.6737	10.6887	10.522	10.8755	11.0521	10.9667	10.9201	10.6901	10.477
15344031	g335290077:+:1-2536	MYH14	LOC100525110	-0.334456	6.54429	-4.54438	0.00027925	0.0412174	0.550611	187	-1.2609	NA	XM_005664770	PREDICTED: Sus scrofa myosin-14 (LOC100525110), mRNA.	25	---	NA	6.44677	6.43736	6.12644	6.41202	6.38288	6.30413	6.76412	6.76004	6.64396	6.52511	6.3201	6.65776
15248940	chr17:-:37748217-37789548	HCK	HCK	-0.33605	4.67704	-4.54365	0.000279689	0.0412174	0.55293	186	-1.2623	HCK proto-oncogene, Src family tyrosine kinase	XM_013985220	PREDICTED: Sus scrofa HCK proto-oncogene, Src family tyrosine kinase (HCK), transcript variant X1, mRNA.	20	ENSSSCT00000007921 // GO:0007169 // transmembrane receptor protein tyrosine kinase signaling pathway // --- /// ENSSSCT00000007921 // GO:0030154 // cell differentiation // --- /// ENSSSCT00000007921 // GO:0038083 // peptidyl-tyrosine autophosphorylation // --- /// ENSSSCT00000007921 // GO:0042127 // regulation of cell proliferation // --- /// ENSSSCT00000007921 // GO:0043066 // negative regulatio…	ENSSSCT00000007921	4.58901	4.41513	4.56395	4.46185	4.70073	4.48427	4.60772	5.22542	4.62592	4.6785	4.68537	4.89384
15280560	chr4:+:99887769-100006292	GATAD2B	GATAD2B	-0.337354	9.28185	-6.14772	1.01846e-05	0.00751333	3.58485	38	-1.26344	GATA zinc finger domain containing 2B	XM_013997086	PREDICTED: Sus scrofa GATA zinc finger domain containing 2B (GATAD2B), transcript variant X1, mRNA.	30	ENSSSCT00000007189 // GO:0006355 // regulation of transcription, DNA-templated // inferred from electronic annotation /// ENSSSCT00000007189 // GO:0043044 // ATP-dependent chromatin remodeling // inferred from electronic annotation /// ENSSSCT00000007189 // GO:0000122 // negative regulation of transcription from RNA polymerase II promoter // --- /// ENSSSCT00000007189 // GO:0006306 // DNA methyla…	ENSSSCT00000007189	9.02715	9.0825	9.00486	8.80892	9.19614	9.05923	9.33531	9.43981	9.18799	9.34903	9.16827	9.30117
15343921	g335289747:+:1-446	AXL	AXL	-0.33881	7.29786	-4.52497	0.000291147	0.0426779	0.510336	188	-1.26471	NA	NM_001128458	Sus scrofa AXL receptor tyrosine kinase (AXL), mRNA.	27	---	NA	7.04697	7.09832	7.11877	7.24802	7.17946	7.18511	7.18523	7.5194	7.32127	7.43636	7.22013	7.5419
15348133	g335303398:+:1-828	SPEG	LOC100737722	-0.341714	7.9823	-4.70524	0.000197839	0.0380828	0.870888	141	-1.26726	NA	XM_013984533	PREDICTED: Sus scrofa striated muscle preferentially expressed protein kinase (LOC100737722), mRNA.	25	---	NA	7.51817	7.82036	7.6867	7.53995	8.28432	7.92565	8.03214	8.35721	7.94353	7.95991	7.99555	8.03722
15228239	chr14:+:118861339-118874214	WBP1L	WBP1L	-0.343582	9.62199	-4.61421	0.00024038	0.0389354	0.690728	169	-1.2689	WW domain binding protein 1-like	XM_001929157	PREDICTED: Sus scrofa WW domain binding protein 1-like (WBP1L), transcript variant X1, mRNA.	22	---	ENSSSCT00000031259	9.38801	9.42327	9.38774	9.22873	9.30673	9.54211	9.95766	9.79339	9.48761	9.53815	9.54563	9.38724
15348169	g335303552:+:1-765	AGAP1	AGAP1	-0.344729	7.55089	-4.81415	0.000156866	0.0340386	1.08448	127	-1.26991	NA	XM_013984623	PREDICTED: Sus scrofa ArfGAP with GTPase domain, ankyrin repeat and PH domain 1 (AGAP1), mRNA.	25	---	NA	7.24133	7.47383	7.44632	7.46507	7.36593	7.31193	7.84956	7.70165	7.70759	7.34927	7.5605	7.67295
15341905	g335282245:+:1-2654	TMEM259	TMEM259	-0.346836	8.63348	-4.31172	0.000461302	0.0490807	0.0811961	260	-1.27177	NA	XM_005661368	PREDICTED: Sus scrofa transmembrane protein 259 (TMEM259), transcript variant X1, mRNA.	25	---	NA	8.37082	8.39828	8.12929	8.26188	8.61567	8.48593	8.86754	8.79006	8.41398	8.61873	8.58013	8.58083
15204862	chr11:-:8527976-8572297	NA	NA	-0.34981	5.13601	-4.33415	0.000439445	0.0484992	0.137071	248	-1.27439	NA	NA	NA	9	---	NA	5.16375	5.33682	4.92546	5.33801	5.05571	4.86939	5.57581	5.50084	5.3319	5.19825	5.2489	4.70936
15316184	chr7:-:44970757-45122758	Mrps18a	LOC102158964	-0.355429	9.10145	-4.26741	0.000507779	0.0505176	-0.00908084	277	-1.27937	mitochondrial ribosomal protein S18A	XM_005654196	PREDICTED: Sus scrofa 28S ribosomal protein S18a, mitochondrial-like (LOC102158964), transcript variant X2, mRNA.	29	ENSSSCT00000001889 // GO:0006412 // translation // inferred from electronic annotation	ENSSSCT00000001889	8.72606	8.88799	8.78474	8.50767	8.91238	8.89488	9.07652	9.2472	9.02663	8.99453	8.99682	9.06119
15328729	chr9:-:19098-28703	TRIM66	TRIM66	-0.358196	7.36908	-5.06805	9.17315e-05	0.0268929	1.58133	94	-1.28182	NA	XM_013979084	PREDICTED: Sus scrofa tripartite motif containing 66 (TRIM66), transcript variant X1, mRNA.	27	---	NA	7.22094	7.23535	7.21688	7.03729	7.14647	7.28211	7.40795	7.73131	7.41251	7.4762	7.2352	7.49099
15297527	chr6:+:37587860-37602581	BCAT2	BCAT2	-0.360576	9.10381	-6.6327	3.98606e-06	0.00494414	4.42863	21	-1.28394	branched chain amino-acid transaminase 2, mitochondrial	XM_003127278	PREDICTED: Sus scrofa branched chain amino-acid transaminase 2, mitochondrial (BCAT2), transcript variant X2, mRNA.	32	XM_003127278 // GO:0006550 // isoleucine catabolic process // inferred from electronic annotation /// XM_003127278 // GO:0006551 // leucine metabolic process // inferred from electronic annotation /// XM_003127278 // GO:0006573 // valine metabolic process // inferred from electronic annotation /// XM_003127278 // GO:0009082 // branched-chain amino acid biosynthetic process // inferred from electr…	ENSSSCT00000003480	8.84059	9.00909	8.80472	8.77339	9.04252	8.54114	9.18493	9.28747	9.021	8.98055	9.01838	9.2032
15350719	g335310654:+:1-980	SH3BGRL3	SH3BGRL3	-0.362732	8.02158	-5.46133	4.05138e-05	0.0177632	2.33012	62	-1.28586	NA	XM_013992300	PREDICTED: Sus scrofa SH3 domain binding glutamate-rich protein like 3 (SH3BGRL3), mRNA.	25	---	NA	7.95299	7.73524	7.51181	7.45308	7.82103	7.74543	7.97862	8.09894	7.86321	7.97798	7.89235	8.12476
15224166	---:---:-------	NA	NA	-0.36775	8.11942	-4.352	0.000422795	0.0481463	0.175905	241	-1.29034	NA	NA	NA	2	---	NA	7.93192	7.83128	7.87724	8.03879	7.96525	8.04684	8.18845	8.32467	7.98249	8.14148	8.65501	8.28548
15291223	chr5:-:3556655-3584401	ACO2	ACO2	-0.375206	10.8615	-5.46019	4.06082e-05	0.0177632	2.28077	63	-1.29702	aconitase 2, mitochondrial	NM_213954	Sus scrofa aconitase 2, mitochondrial (ACO2), mRNA.	24	NM_213954 // GO:0006099 // tricarboxylic acid cycle // inferred from electronic annotation /// NM_213954 // GO:0008152 // metabolic process // inferred from electronic annotation /// ENSSSCT00000000070 // GO:0006099 // tricarboxylic acid cycle // inferred from electronic annotation /// ENSSSCT00000000070 // GO:0008152 // metabolic process // inferred from electronic annotation /// ENSSSCT00000000…	ENSSSCT00000000070	10.6805	10.688	10.475	10.644	10.5751	10.562	11.1833	11.0391	10.7462	10.8045	10.5497	10.9261
15220254	chr13:-:29058309-29067362	ALAS1	ALAS1	-0.376905	9.00914	-4.59646	0.000249704	0.0397765	0.65635	173	-1.29855	NA	NR_029391	Sus scrofa aminolevulinate, delta-, synthase 1 pseudogene (ALAS1), non-coding RNA.	27	ENSSSCT00000012517 // GO:0008152 // metabolic process // inferred from electronic annotation /// ENSSSCT00000012517 // GO:0006778 // porphyrin-containing compound metabolic process // inferred from electronic annotation /// ENSSSCT00000012517 // GO:0006782 // protoporphyrinogen IX biosynthetic process // inferred from electronic annotation /// ENSSSCT00000012517 // GO:0006783 // heme biosynthetic…	ENSSSCT00000012517	8.764	8.61748	8.96016	8.75276	8.70382	8.77589	9.40179	9.16942	9.01219	9.12159	8.72683	8.89389
15277516	chr4:+:479519-484656	VPS28	VPS28	-0.384807	8.7271	-7.40525	9.55564e-07	0.00239395	5.68059	11	-1.30568	vacuolar protein sorting 28 homolog (S. cerevisiae)	XM_001927458	PREDICTED: Sus scrofa vacuolar protein sorting 28 homolog (S. cerevisiae) (VPS28), mRNA.	22	XM_001927458 // GO:0043328 // protein targeting to vacuole involved in ubiquitin-dependent protein catabolic process via the multivesicular body sorting pathway // --- /// ENSSSCT00000006484 // GO:0031397 // negative regulation of protein ubiquitination // inferred from electronic annotation /// ENSSSCT00000006484 // GO:0045732 // positive regulation of protein catabolic process // inferred from …	ENSSSCT00000006484 ENSSSCT00000032690 ENSSSCT00000036001	8.38488	8.38063	8.61874	8.37164	8.43785	8.4447	8.8146	8.77898	8.58235	8.58849	8.7993	8.76345
15277802	chr4:+:6827942-6863423	NDRG1	NDRG1	-0.386939	6.7863	-4.65129	0.000222029	0.0389354	0.763437	153	-1.30762	N-myc downstream regulated 1	XM_005662839	PREDICTED: Sus scrofa N-myc downstream regulated 1 (NDRG1), mRNA.	27	ENSSSCT00000006527 // GO:0008285 // negative regulation of cell proliferation // inferred from electronic annotation /// ENSSSCT00000006527 // GO:0030330 // DNA damage response, signal transduction by p53 class mediator // inferred from electronic annotation /// ENSSSCT00000006527 // GO:0032287 // peripheral nervous system myelin maintenance // inferred from electronic annotation /// ENSSSCT00000…	ENSSSCT00000006527	6.86281	6.54214	6.51339	6.55657	6.37951	6.52536	7.03016	6.96286	6.90263	6.81554	6.51142	6.74997
15301722	chr6:-:9750402-9758751	PDPR	PDPR	-0.389267	7.54881	-6.48763	5.25966e-06	0.00557483	4.13716	26	-1.30973	pyruvate dehydrogenase phosphatase regulatory subunit, mitochondrial-like	XM_013994443	PREDICTED: Sus scrofa pyruvate dehydrogenase phosphatase regulatory subunit (PDPR), mRNA.	24	ENSSSCT00000003018 // GO:0055114 // oxidation-reduction process // inferred from electronic annotation	ENSSSCT00000003018	7.2604	7.14845	7.36282	7.35395	7.37258	7.33493	7.66092	7.75512	7.56098	7.67993	7.54744	7.6145
15351589	---:---:-------	NA	NA	-0.389528	6.98164	-4.96555	0.000113825	0.0293159	1.37513	107	-1.30997	NA	NA	NA	9	---	NA	6.9265	6.8628	6.81106	7.59123	6.9984	6.823	7.31252	7.23219	7.18485	6.89855	7.46333	7.36804
15233557	chr14:-:111954319-112193346	SORBS1	SORBS1	-0.391807	8.41378	-5.31877	5.43704e-05	0.0202478	2.05635	74	-1.31204	sorbin and SH3 domain containing 1	XM_005671328	PREDICTED: Sus scrofa sorbin and SH3 domain containing 1 (SORBS1), transcript variant X23, mRNA.	42	ENSSSCT00000011482 // GO:0007015 // actin filament organization // inferred from electronic annotation /// ENSSSCT00000011482 // GO:0008286 // insulin receptor signaling pathway // inferred from electronic annotation	ENSSSCT00000011482	8.57243	8.42706	8.23218	8.18024	8.18541	8.07364	8.7442	8.62531	8.47921	8.51471	8.38461	7.99982
15213447	chr12:-:47316615-47326109	ATP2A3	ATP2A3	-0.395445	6.68946	-5.62805	2.88106e-05	0.0144357	2.61373	55	-1.31535	ATPase, Ca++ transporting, ubiquitous	XM_013981226	PREDICTED: Sus scrofa ATPase, Ca++ transporting, ubiquitous (ATP2A3), mRNA.	22	ENSSSCT00000019450 // GO:0008152 // metabolic process // inferred from electronic annotation /// ENSSSCT00000019450 // GO:0070588 // calcium ion transmembrane transport // inferred from electronic annotation	ENSSSCT00000019450	6.47515	6.4153	6.53145	6.5025	6.5484	6.6234	6.8668	7.19378	6.72397	6.63381	6.54026	6.95617
15280768	chr4:+:101856732-101861445	RFX5	RFX5	-0.398537	6.81799	-4.45818	0.000336174	0.0446505	0.38152	202	-1.31817	regulatory factor X, 5 (influences HLA class II expression)	XM_003125766	PREDICTED: Sus scrofa regulatory factor X, 5 (influences HLA class II expression) (RFX5), transcript variant X1, mRNA.	25	XM_005663455 // GO:0000122 // negative regulation of transcription from RNA polymerase II promoter // inferred from electronic annotation /// XM_005663455 // GO:0006355 // regulation of transcription, DNA-templated // inferred from electronic annotation /// XM_005663455 // GO:0006357 // regulation of transcription from RNA polymerase II promoter // --- /// XM_005663456 // GO:0000122 // negative r…	NA	6.56605	6.50945	6.49735	6.50763	7.12502	6.49126	6.84635	6.82393	7.06869	6.53906	6.82815	7.085
15345225	g335293984:+:1-667	TET2	LOC100521465	-0.398839	8.54954	-4.65608	0.000219761	0.0389354	0.774139	152	-1.31845	NA	XM_003129278	PREDICTED: Sus scrofa methylcytosine dioxygenase TET2 (LOC100521465), transcript variant X1, mRNA.	25	---	NA	8.54241	8.13743	8.09162	8.12907	8.29336	8.19608	9.16838	8.4412	8.3838	8.69638	8.31642	8.55265
15223560	chr14:+:12507675-12556035	EXTL3	EXTL3	-0.404941	6.97444	-5.63287	2.85294e-05	0.0144357	2.65273	54	-1.32403	exostosin-like glycosyltransferase 3	XM_001928897	PREDICTED: Sus scrofa exostosin-like glycosyltransferase 3 (EXTL3), mRNA.	23	ENSSSCT00000010614 // GO:0015012 // heparan sulfate proteoglycan biosynthetic process // inferred from electronic annotation /// ENSSSCT00000010614 // GO:0006024 // glycosaminoglycan biosynthetic process // inferred from electronic annotation	ENSSSCT00000010614	6.56657	7.0622	6.47309	6.77089	6.68253	6.68691	7.09499	7.06753	6.7366	6.86091	6.97931	7.18941
15199326	chr1:-:286923581-287082755	RAPGEF1	LOC106507004	-0.407216	9.43707	-7.97925	3.4827e-07	0.0010664	6.57795	9	-1.32612	rap guanine nucleotide exchange factor 1-like	XM_013986309	PREDICTED: Sus scrofa rap guanine nucleotide exchange factor 1-like (LOC106507004), mRNA.	22	---	NA	9.17793	9.07502	9.20942	9.24953	9.33716	9.26645	9.69749	9.67654	9.41782	9.401	9.42545	9.42486
15286590	chr4:-:116997255-117314435	NTNG1	NTNG1	-0.407596	4.59633	-5.29391	5.72464e-05	0.0205398	2.00314	76	-1.32647	netrin G1	XM_013997331	PREDICTED: Sus scrofa netrin G1 (NTNG1), transcript variant X1, mRNA.	29	ENSSSCT00000007505 // GO:0007409 // axonogenesis // inferred from electronic annotation	ENSSSCT00000007505 ENSSSCT00000022367 ENSSSCT00000033782	4.24824	4.41587	4.59417	4.60835	4.53299	4.75292	4.92044	5.06166	4.61644	4.58824	5.04419	4.63379
15340787	g311271792:+:1-844	NA	NA	-0.408702	5.35836	-5.18524	7.17725e-05	0.0229989	1.8065	86	-1.32749	NA	NA	NA	24	---	NA	5.26608	5.27436	5.51503	5.1207	4.98516	5.18395	5.69039	5.41081	5.34835	5.42462	5.48063	5.69846
15207881	chr12:+:21485201-21661479	SP2	LOC100738594	-0.414723	7.76255	-5.99651	1.37329e-05	0.00901072	3.31069	42	-1.33304	transcription factor Sp2	XM_005653949	PREDICTED: Sus scrofa transcription factor Sp2 (LOC100738594), mRNA.	17	XM_005653949 // GO:0001701 // in utero embryonic development // inferred from electronic annotation /// XM_005653949 // GO:0006357 // regulation of transcription from RNA polymerase II promoter // --- /// XM_005653949 // GO:0035264 // multicellular organism growth // inferred from electronic annotation /// XM_005653949 // GO:0048144 // fibroblast proliferation // inferred from electronic annotati…	ENSSSCT00000019070	7.44524	7.68129	7.3958	7.26025	7.51172	7.42718	7.88897	7.91038	7.65658	7.84369	7.52489	7.65396
15343333	g335287897:+:1-835	HOXC6	HOXC6	-0.415934	7.84945	-7.26264	1.23628e-06	0.00262072	5.40233	13	-1.33416	NA	XM_003355424	PREDICTED: Sus scrofa homeobox C6 (HOXC6), mRNA.	25	---	NA	7.59319	7.64088	7.55548	7.41376	7.88491	7.56644	8.01597	8.17843	7.43336	7.91506	7.88614	7.99277
15265170	chr2:-:62467012-62472282	PDCB4	LOC100736865	-0.417761	4.83498	-4.73946	0.000183905	0.037167	0.938081	135	-1.33585	PLASMODESMATA CALLOSE-BINDING PROTEIN 4-like	XM_003480756	PREDICTED: Sus scrofa PLASMODESMATA CALLOSE-BINDING PROTEIN 4-like (LOC100736865), transcript variant X1, mRNA.	25	---	ENSSSCT00000015188	4.57937	4.78619	4.74574	4.90084	4.57381	4.93646	5.09157	5.30599	4.88985	4.79718	5.37798	4.89649
15257382	chr2:+:58642586-58643500	NA	NA	-0.421107	2.08265	-5.51632	3.6191e-05	0.0174974	2.42172	57	-1.33895	NA	NA	NA	13	---	NA	1.91485	2.0096	1.70342	1.97989	1.99366	2.31223	2.41302	2.16587	2.0617	2.11556	2.30342	2.58066
15301310	chr6:-:171226-171336	NA	NA	-0.426904	5.78746	-4.27333	0.000501306	0.0502364	0.00899492	274	-1.34435	NA	NA	NA	10	---	NA	5.79919	5.62513	5.62812	5.92432	5.47508	5.56081	5.9892	5.99523	5.7894	6.18356	5.73891	6.18167
15296142	chr6:+:19161086-19167134	NA	NA	-0.438962	5.90045	-4.34782	0.000426639	0.0481857	0.154616	245	-1.35563	NA	NA	NA	27	---	NA	5.76992	5.57187	5.56529	5.65739	5.87768	5.57617	5.76545	6.07247	5.84909	5.86897	6.05849	6.20785
15291624	chr5:-:10942456-11073111	Btbd11	LOC100627589	-0.439714	4.79888	-5.14296	7.84015e-05	0.0239476	1.72385	90	-1.35634	ankyrin repeat and BTB/POZ domain-containing protein BTBD11	XM_003355366	PREDICTED: Sus scrofa ankyrin repeat and BTB/POZ domain-containing protein BTBD11 (LOC100627589), mRNA.	30	---	NA	4.3704	4.81568	4.60067	4.73869	4.71263	4.65571	4.8693	5.21379	4.95143	4.99093	4.68605	5.20085
15255292	chr2:+:36585705-36585811	NA	NA	-0.439777	2.95654	-4.73963	0.000183837	0.037167	0.929492	137	-1.35639	NA	NA	NA	13	---	NA	3.65357	2.44882	2.78166	2.58932	3.03591	2.83798	3.39573	3.2769	2.7991	2.92784	2.99813	3.22236
15344641	g335291585:+:1-3606	IPO13	IPO13	-0.440677	9.57171	-6.13902	1.03602e-05	0.00751333	3.58763	37	-1.35724	NA	XM_003356487	PREDICTED: Sus scrofa importin 13 (IPO13), transcript variant X1, mRNA.	25	---	NA	9.2827	9.30712	9.19458	9.14054	9.30665	9.32507	9.62272	9.90384	9.55454	9.60677	9.38128	9.58738
15261370	chr2:-:6257340-6425983	VEGFB	VEGFB	-0.454781	8.18376	-5.35432	5.05129e-05	0.0196061	2.12104	71	-1.37057	vascular endothelial growth factor B	XM_003122578	PREDICTED: Sus scrofa vascular endothelial growth factor B (VEGFB), transcript variant X2, mRNA.	25	---	NA	7.84724	7.96775	7.58147	7.80083	7.86769	8.12818	8.51649	8.35293	8.23118	8.25839	7.75848	8.10944
15285030	chr4:-:97397214-97411009	MEF2D	MEF2D	-0.459215	10.2191	-4.64583	0.000224637	0.0389354	0.752312	156	-1.37479	myocyte enhancer factor 2D	XM_003125698	PREDICTED: Sus scrofa myocyte enhancer factor 2D (MEF2D), transcript variant X1, mRNA.	27	XM_003125698 // GO:0006351 // transcription, DNA-templated // inferred from electronic annotation /// XM_003125698 // GO:0006355 // regulation of transcription, DNA-templated // inferred from electronic annotation /// XM_005663268 // GO:0006351 // transcription, DNA-templated // inferred from electronic annotation /// XM_005663268 // GO:0006355 // regulation of transcription, DNA-templated // inf…	ENSSSCT00000007100	9.94453	10.2085	9.92306	9.52968	9.89329	9.89984	10.4074	10.2743	10.3496	10.2331	10.0586	10.2381
15265688	chr2:-:70734020-70778550	SIMC1	SIMC1	-0.46043	7.3643	-7.02695	1.90372e-06	0.00308605	5.08041	17	-1.37595	NA	XM_005661476	PREDICTED: Sus scrofa SUMO-interacting motifs containing 1 (SIMC1), mRNA.	29	---	NA	6.79274	7.21509	7.05377	7.30632	6.9341	7.17417	7.56572	7.67313	7.35666	7.37292	7.27203	7.37126
15241814	chr15:-:126094735-126191031	INPP5D	LOC102164571	-0.462476	6.34482	-4.3881	0.000391063	0.047587	0.23971	226	-1.3779	phosphatidylinositol 3,4,5-trisphosphate 5-phosphatase 1-like	XM_013984594	PREDICTED: Sus scrofa phosphatidylinositol 3,4,5-trisphosphate 5-phosphatase 1-like (LOC102164571), mRNA.	22	ENSSSCT00000017748 // GO:0035556 // intracellular signal transduction // inferred from electronic annotation /// ENSSSCT00000017748 // GO:0006470 // protein dephosphorylation // inferred from electronic annotation /// ENSSSCT00000017748 // GO:0008285 // negative regulation of cell proliferation // inferred from electronic annotation /// ENSSSCT00000017748 // GO:0008340 // determination of adult l…	ENSSSCT00000017748	6.64993	5.98681	6.02085	6.07269	6.22957	6.0753	6.01809	6.76839	6.24953	6.39243	6.25229	6.71658
15195284	chr1:-:137318532-137325210	BAHD1	BAHD1	-0.466763	5.61942	-5.52461	3.55821e-05	0.0174974	2.45739	56	-1.38201	bromo adjacent homology domain containing 1	XM_013993174	PREDICTED: Sus scrofa bromo adjacent homology domain containing 1 (BAHD1), transcript variant X1, mRNA.	27	ENSSSCT00000005271 // GO:0045892 // negative regulation of transcription, DNA-templated // inferred from electronic annotation /// ENSSSCT00000005271 // GO:0031507 // heterochromatin assembly // inferred from electronic annotation /// ENSSSCT00000005271 // GO:0006342 // chromatin silencing // --- /// ENSSSCT00000005271 // GO:0031507 // heterochromatin assembly // ---	ENSSSCT00000005271	5.60704	5.42507	5.19724	5.2551	5.41119	5.36051	5.86967	5.74709	5.50513	5.62655	5.65456	5.93326
15341861	g335282120:+:1-2808	NAV2	LOC100521947	-0.469078	6.40017	-4.32512	0.000448115	0.0486187	0.112966	253	-1.38422	NA	XM_013994482	PREDICTED: Sus scrofa neuron navigator 2 (LOC100521947), mRNA.	25	---	NA	6.54588	6.22692	6.49326	6.12954	6.08358	6.32174	6.92914	5.75533	6.57137	6.42445	6.30082	6.85474
15248908	chr17:-:37410263-37422399	MYLK2	MYLK2	-0.469193	10.3241	-4.44395	0.000346648	0.0446505	0.349767	214	-1.38434	myosin light chain kinase 2	XM_013985219	PREDICTED: Sus scrofa myosin light chain kinase 2 (MYLK2), mRNA.	19	ENSSSCT00000007911 // GO:0006468 // protein phosphorylation // inferred from electronic annotation /// ENSSSCT00000007911 // GO:0006941 // striated muscle contraction // inferred from electronic annotation /// ENSSSCT00000007911 // GO:0007274 // neuromuscular synaptic transmission // inferred from electronic annotation /// ENSSSCT00000007911 // GO:0010628 // positive regulation of gene expression…	ENSSSCT00000007911	9.92252	10.1588	10.0661	9.85615	10.4501	9.9521	10.4012	10.9497	10.1213	10.4201	10.3094	10.4627
15270710	chr3:+:54044733-54045914	VAMP5	LOC102163597	-0.469601	7.49725	-4.74111	0.00018326	0.037167	0.941309	134	-1.38473	vesicle-associated membrane protein 5-like	XM_005662412	PREDICTED: Sus scrofa vesicle-associated membrane protein 5-like (LOC102163597), mRNA.	21	ENSSSCT00000009014 // GO:0016192 // vesicle-mediated transport // inferred from electronic annotation /// ENSSSCT00000009014 // GO:0006887 // exocytosis // --- /// ENSSSCT00000009014 // GO:0006906 // vesicle fusion // ---	ENSSSCT00000009014	7.31156	6.94244	7.16906	7.25225	7.65874	7.1019	7.33374	7.97411	7.53601	7.37544	7.46417	7.66619
15280337	chr4:+:98648919-98653623	SCAMP3	SCAMP3	-0.471507	8.9045	-4.56543	0.000266899	0.0410905	0.590123	179	-1.38656	secretory carrier membrane protein 3	NA	NA	8	ENSSSCT00000007140 // GO:0010033 // response to organic substance // inferred from electronic annotation /// ENSSSCT00000007140 // GO:0015031 // protein transport // inferred from electronic annotation /// ENSSSCT00000007140 // GO:0032526 // response to retinoic acid // inferred from electronic annotation	ENSSSCT00000007140	8.4208	8.62673	8.36771	8.38729	8.90899	8.85524	9.11222	9.05881	8.70929	8.86665	8.95429	8.85581
15215540	chr13:+:27284676-27360380	SLC38A3	SLC38A3	-0.479491	8.76615	-5.48887	3.8286e-05	0.0177632	2.36673	59	-1.39425	solute carrier family 38, member 3	XM_003358448	PREDICTED: Sus scrofa solute carrier family 38, member 3 (SLC38A3), transcript variant X2, mRNA.	27	XM_003358448 // GO:0003333 // amino acid transmembrane transport // --- /// XM_003358448 // GO:0006867 // asparagine transport // --- /// XM_003358448 // GO:0006867 // asparagine transport // inferred from electronic annotation /// XM_003358448 // GO:0006868 // glutamine transport // --- /// XM_003358448 // GO:0006868 // glutamine transport // inferred from electronic annotation /// XM_003358448 …	ENSSSCT00000012475	7.76874	8.19098	8.11588	8.17831	8.81907	8.54346	8.63892	9.76715	8.52587	8.57306	8.67008	8.67101
15267240	chr2:-:133615751-133631427	SH3RF2	SH3RF2	-0.491705	8.50062	-4.33106	0.000442388	0.0484992	0.119205	252	-1.40611	SH3 domain containing ring finger 2	XM_005661782	PREDICTED: Sus scrofa SH3 domain containing ring finger 2 (SH3RF2), partial mRNA.	24	---	ENSSSCT00000015749	8.09053	8.11499	8.21014	8.42701	8.7116	8.1373	8.62355	8.87334	8.43016	8.60405	8.55531	8.63567
15195906	chr1:-:169021632-169072578	MALT1	MALT1	-0.491893	6.15956	-4.45245	0.000340351	0.0446505	0.367435	208	-1.40629	NA	NA	NA	10	ENSSSCT00000005425 // GO:0001923 // B-1 B cell differentiation // inferred from electronic annotation /// ENSSSCT00000005425 // GO:0002237 // response to molecule of bacterial origin // inferred from electronic annotation /// ENSSSCT00000005425 // GO:0002726 // positive regulation of T cell cytokine production // inferred from electronic annotation /// ENSSSCT00000005425 // GO:0016567 // protein …	NA	5.68067	5.76606	5.64219	5.77946	6.57329	6.33447	6.45617	6.40426	6.05729	6.2105	6.03467	6.19774
15273451	chr3:-:8716052-8758504	RHBDD2	RHBDD2	-0.495704	7.84001	-8.8423	8.26926e-08	0.000895821	7.72548	1	-1.41001	rhomboid domain containing 2	XM_013991214	PREDICTED: Sus scrofa rhomboid domain containing 2 (RHBDD2), mRNA.	22	ENSSSCT00000008441 // GO:0006508 // proteolysis // inferred from electronic annotation	ENSSSCT00000008441	7.45743	7.47344	7.45751	7.33492	7.41059	7.57523	7.97544	8.19023	7.7274	7.67414	7.64622	7.76961
15302473	chr6:-:30177671-30179687	HSPB6	HSPB6	-0.516202	10.9618	-5.08435	8.86457e-05	0.0262677	1.60441	93	-1.43018	heat shock protein, alpha-crystallin-related, B6	XM_003127059	PREDICTED: Sus scrofa heat shock protein, alpha-crystallin-related, B6 (HSPB6), mRNA.	23	ENSSSCT00000025250 // GO:0006950 // response to stress // inferred from electronic annotation	ENSSSCT00000025250 ENSSSCT00000027230	10.711	10.3564	10.4966	10.598	10.4948	10.6496	11.1774	10.9909	10.8819	11.2773	10.4358	10.9675
15254823	chr2:+:13357967-13365882	ACP2	ACP2	-0.516344	7.6104	-4.31822	0.000454861	0.0490807	0.0939313	255	-1.43033	acid phosphatase 2, lysosomal	NM_001244740	Sus scrofa acid phosphatase 2, lysosomal (ACP2), mRNA.	28	ENSSSCT00000014462 // GO:0016311 // dephosphorylation // inferred from electronic annotation /// ENSSSCT00000035319 // GO:0016311 // dephosphorylation // inferred from electronic annotation /// ENSSSCT00000035718 // GO:0016311 // dephosphorylation // inferred from electronic annotation /// ENSSSCT00000029421 // GO:0016311 // dephosphorylation // inferred from electronic annotation	ENSSSCT00000014462 ENSSSCT00000035319 ENSSSCT00000035718 ENSSSCT00000029421	7.74399	7.00555	7.24915	7.3231	7.55909	7.16765	7.60574	8.05994	7.64871	7.39074	7.62282	7.94991
15241402	chr15:-:114251285-114260087	ATG9A	ATG9A	-0.51725	8.48666	-8.2059	2.36584e-07	0.000931396	6.86949	7	-1.43122	autophagy related 9A	NM_001190275	Sus scrofa autophagy related 9A (ATG9A), mRNA.	25	ENSSSCT00000017652 // GO:0000045 // autophagosome assembly // inferred from electronic annotation /// ENSSSCT00000017652 // GO:0000045 // autophagosome assembly // --- /// ENSSSCT00000017652 // GO:0000422 // mitophagy // --- /// ENSSSCT00000017652 // GO:0006914 // autophagy // inferred from electronic annotation /// ENSSSCT00000017652 // GO:0032688 // negative regulation of interferon-beta produc…	ENSSSCT00000017652	8.01534	8.23253	8.12452	8.18994	8.22604	8.24189	8.6531	8.74383	8.48191	8.51379	8.40132	8.31516
15223282	chr14:+:7385355-7579812	NA	NA	-0.51853	2.96108	-4.633	0.000230894	0.0389354	0.728947	160	-1.43249	NA	NA	NA	8	---	NA	2.83867	2.76104	2.83385	2.48807	2.78245	2.71884	3.353	3.11421	3.34381	2.99576	3.2531	3.12178
15209970	chr12:+:55001901-55028481	COX10	COX10	-0.530961	6.6242	-4.6834	0.000207289	0.0385977	0.827147	148	-1.44489	COX10 homolog, cytochrome c oxidase assembly protein, heme A: farnesyltransferase (yeast)	NM_001244626	Sus scrofa COX10 homolog, cytochrome c oxidase assembly protein, heme A: farnesyltransferase (yeast) (COX10), mRNA.	12	ENSSSCT00000019618 // GO:0048034 // heme O biosynthetic process // inferred from electronic annotation	ENSSSCT00000019618	6.28857	6.13331	5.7028	6.28871	6.45445	6.21685	6.61864	6.82668	6.96022	6.49552	6.45795	6.63137
15213210	---:---:-------	NA	NA	-0.536115	9.25662	-5.40184	4.57917e-05	0.0187153	2.21516	66	-1.45006	NA	NA	NA	1	---	NA	8.76798	8.78409	8.91697	9.38505	9.36955	8.92817	9.26208	9.47891	9.60747	9.29575	9.16426	9.54146
15333538	chrX:+:32998805-33053762	XK	XK	-0.536626	6.9274	-5.17904	7.27079e-05	0.0230308	1.791	87	-1.45058	X-linked Kx blood group	XM_003135014	PREDICTED: Sus scrofa X-linked Kx blood group (XK), mRNA.	20	XM_003135014 // GO:0006874 // cellular calcium ion homeostasis // inferred from electronic annotation /// XM_003135014 // GO:0008361 // regulation of cell size // inferred from electronic annotation /// XM_003135014 // GO:0010961 // cellular magnesium ion homeostasis // inferred from electronic annotation /// XM_003135014 // GO:0031133 // regulation of axon diameter // inferred from electronic an…	ENSSSCT00000025659	6.55748	6.78785	6.55767	6.56555	6.93503	6.52227	7.22367	7.12665	6.96098	7.0693	6.9114	6.51703
15232334	chr14:-:65804686-65924417	CCDC6	CCDC6	-0.547834	9.64287	-4.28235	0.0004916	0.0499909	0.0209594	272	-1.46189	coiled-coil domain containing 6	XM_001929282	PREDICTED: Sus scrofa coiled-coil domain containing 6 (CCDC6), mRNA.	23	---	ENSSSCT00000011177	9.23998	9.52127	9.24894	9.28432	9.52518	9.38242	9.92659	9.84731	9.78361	9.95834	9.34601	9.82135
15182081	---:---:-------	NA	NA	-0.547884	5.16605	-4.3694	0.000407186	0.0476422	0.203072	234	-1.46194	NA	NA	NA	4	---	NA	4.42095	4.94787	4.9055	5.30748	5.67105	5.02637	5.54345	5.95821	5.3006	5.43436	5.18272	5.43804
15327738	chr9:+:101320986-101322519	EPDR1	EPDR1	-0.567698	7.93635	-6.67371	3.68748e-06	0.00483902	4.33671	24	-1.48216	ependymin related 1	XM_013989608	PREDICTED: Sus scrofa ependymin related 1 (EPDR1), mRNA.	24	ENSSSCT00000031911 // GO:0007160 // cell-matrix adhesion // inferred from electronic annotation	ENSSSCT00000031911	7.56412	7.68998	7.57959	7.59339	7.6973	7.92513	8.28029	8.21595	7.63234	7.62608	8.02019	8.2974
15278938	chr4:+:67622110-67623120	SLCO5A1	LOC100738208	-0.579567	7.70228	-4.63176	0.000231509	0.0389354	0.721815	161	-1.4944	solute carrier organic anion transporter family member 5A1-like	XM_013996683	PREDICTED: Sus scrofa solute carrier organic anion transporter family member 5A1-like (LOC100738208), mRNA.	23	ENSSSCT00000006791 // GO:0006810 // transport // inferred from electronic annotation /// ENSSSCT00000006791 // GO:0055085 // transmembrane transport // inferred from electronic annotation /// ENSSSCT00000006791 // GO:0006811 // ion transport // inferred from electronic annotation /// ENSSSCT00000006791 // GO:0043252 // sodium-independent organic anion transport // --- /// ENSSSCT00000006791 // GO…	ENSSSCT00000006791	7.35499	7.40968	7.17872	7.21854	7.48172	7.28463	8.04493	8.19644	7.40316	7.5949	7.63936	7.75691
15259657	chr2:+:128410020-128416999	STING1/TMEM173	TMEM173	-0.58925	5.60476	-5.14513	7.80464e-05	0.0239476	1.72864	89	-1.50446	transmembrane protein 173	NM_001142838	Sus scrofa transmembrane protein 173 (TMEM173), mRNA.	26	NM_001142838 // GO:0002218 // activation of innate immune response // inferred from sequence or structural similarity /// NM_001142838 // GO:0006915 // apoptotic process // inferred from electronic annotation /// NM_001142838 // GO:0032481 // positive regulation of type I interferon production // inferred from electronic annotation /// NM_001142838 // GO:0032608 // interferon-beta production // i…	ENSSSCT00000015677 ENSSSCT00000032631 ENSSSCT00000032759 ENSSSCT00000033067 ENSSSCT00000033393 ENSSSCT00000033908 ENSSSCT00000034898 ENSSSCT00000035934 ENSSSCT00000036203 ENSSSCT00000036520	5.59829	5.21657	5.38998	5.60777	5.82969	5.09151	5.52657	6.20811	5.50153	5.79755	5.84964	6.12103
15302817	chr6:-:33177691-33179053	AWN	AWN	-0.589502	3.75896	-4.75949	0.000176218	0.037167	0.962657	130	-1.50473	NA	XM_013988559	PREDICTED: Sus scrofa sperm associated AWN protein (AWN), mRNA.	26	---	NA	3.42799	3.46081	3.29129	3.39745	3.60515	3.5398	3.56027	5.64655	3.04173	3.82866	4.02083	4.24969
15318634	chr7:-:107848922-107849066	NA	NA	-0.62344	3.2687	-5.2263	6.58843e-05	0.022122	1.88714	81	-1.54054	NA	NA	NA	25	---	NA	3.24753	3.0177	3.47644	2.58048	2.88006	3.34273	3.65538	3.67144	3.59016	3.49995	3.20528	3.82312
15347685	g335301357:+:1-1002	NA	NA	-0.626351	3.73799	-4.42405	0.000361854	0.0455341	0.311952	219	-1.54366	NA	NA	NA	10	---	NA	3.77556	4.05055	3.51288	3.36564	3.59478	3.37109	4.34416	3.44138	3.68303	4.16439	3.79462	4.2548
15268560	chr3:+:15608088-15725710	ITGAM	LOC100623210	-0.675858	6.47446	-6.48868	5.24908e-06	0.00557483	4.1684	25	-1.59755	integrin alpha-M-like	XM_013991721	PREDICTED: Sus scrofa integrin alpha-M-like (LOC100623210), mRNA.	19	ENSSSCT00000008501 // GO:0002523 // leukocyte migration involved in inflammatory response // inferred from electronic annotation /// ENSSSCT00000008501 // GO:0007155 // cell adhesion // inferred from electronic annotation /// ENSSSCT00000008501 // GO:0007159 // leukocyte cell-cell adhesion // inferred from electronic annotation /// ENSSSCT00000008501 // GO:0007229 // integrin-mediated signaling p…	ENSSSCT00000008501 ENSSSCT00000032893 ENSSSCT00000036477 ENSSSCT00000036546	6.88261	5.83731	6.35364	6.21164	6.46478	6.22479	5.91406	7.13687	6.64012	6.66781	6.47816	6.96409
15180995	---:---:-------	NA	NA	-0.687337	3.28124	-5.33288	5.28038e-05	0.0202106	2.07336	72	-1.61031	NA	NA	NA	4	---	NA	2.87711	4.08705	3.65174	2.87552	2.8958	2.47856	3.60215	2.13681	3.27999	3.2305	3.36256	3.89999
15344343	g335290895:+:1-976	SERINC2	SERINC2	-0.715448	8.50016	-8.33629	1.89959e-07	0.000895821	7.09567	5	-1.64199	NA	NM_001244148	Sus scrofa serine incorporator 2 (SERINC2), mRNA.	25	---	NA	7.94922	7.95707	7.92402	7.92619	8.24145	8.04601	8.78748	8.82958	8.09524	8.51825	8.44333	8.57284
15314696	---:---:-------	NA	NA	-0.75415	6.25812	-6.03482	1.27276e-05	0.0085548	3.36578	41	-1.68664	NA	NA	NA	1	---	NA	5.72907	6.0668	5.57001	5.83532	6.43151	5.68677	6.50246	6.49852	6.34482	6.5861	5.65109	7.31903
15209183	chr12:+:45319039-45319123	NA	NA	-0.770607	6.04632	-8.32054	1.95041e-07	0.000895821	7.07182	6	-1.70599	NA	NA	NA	25	---	NA	5.95743	5.63759	5.45288	5.6896	5.45114	5.59193	5.93992	6.55739	6.01813	6.06536	5.91505	6.37762
15181609	---:---:-------	NA	NA	-0.834386	3.96748	-6.44484	5.71098e-06	0.00582901	4.011	28	-1.7831	NA	NA	NA	4	---	NA	5.35595	3.2621	3.48359	3.2594	3.01707	3.47147	4.07033	4.76644	4.22919	4.79727	2.71297	4.07668
15181827	---:---:-------	NA	NA	-0.98862	2.15895	-5.43361	4.28905e-05	0.0182136	2.26759	65	-1.98429	NA	NA	NA	2	---	NA	1.68343	1.33153	2.07166	1.6659	1.46539	1.53546	2.81515	2.84661	1.8251	1.86666	1.92979	2.49172
15180069	---:---:-------	NA	NA	-1.00061	2.69605	-6.94332	2.22285e-06	0.00327537	4.84628	19	-2.00084	NA	NA	NA	4	---	NA	2.53591	1.81709	2.55296	3.41084	2.49817	2.30365	1.73276	3.40352	2.96011	2.37758	3.28707	3.94251
15211940	chr12:-:21640003-21643502	PNPO	PNPO	-1.0983	9.6568	-5.2927	5.73904e-05	0.0205398	2.00825	75	-2.14102	NA	XM_013979944	PREDICTED: Sus scrofa pyridoxamine 5-phosphate oxidase (PNPO), mRNA.	25	---	NA	9.35283	9.11563	9.47565	10.7517	9.18293	9.07828	10.8843	10.2938	9.76477	9.30757	10.5025	10.275
15181831	---:---:-------	NA	NA	-1.14654	2.7657	-5.22183	6.65007e-05	0.022122	1.87164	82	-2.21382	NA	NA	NA	4	---	NA	2.52588	3.68695	2.16798	2.07533	2.06079	2.21679	3.45801	1.72445	2.53671	2.95903	3.10781	4.12901
15182585	---:---:-------	NA	NA	-1.34062	3.3522	-4.86899	0.000139624	0.0323341	1.19233	119	-2.5326	NA	NA	NA	1	---	NA	2.31908	3.8507	2.19858	3.54784	2.02921	1.97698	3.84164	3.30812	3.47124	2.92686	3.20038	4.46348
